Overexpression Of Mig-6 In Cartilage Induces An Osteoarthritis-Like Phenotype In Mice

1 **OVEREXPRESSION OF MIG-6 IN CARTILAGE INDUCES AN OSTEOARTHRITIS-**  
2 **LIKE PHENOTYPE IN MICE**

3

4 Bellini, Melina<sup>1,2</sup>, Pest, Michael A.<sup>1,2</sup>; Miranda-Rodrigues, M.<sup>1,2,3</sup>, Jeong JW<sup>4</sup>, Beier, Frank<sup>1,2,3</sup>

5

6 <sup>1</sup> Department of Physiology and Pharmacology, Western University, London, ON, Canada

7 <sup>2</sup> Western University Bone and Joint Institute, London, ON, Canada

8 <sup>3</sup> Children's Health Research Institute, London, ON, Canada

9 <sup>4</sup> Department of Obstetrics, Gynecology and Reproductive Biology, Michigan State University

10 College of Human Medicine, Grand Rapids, Michigan.

11

12

13

14

15

16

17 **Corresponding author:** Dr. Frank Beier, Department of Physiology and Pharmacology, Western

18 University, London, ON, Canada; Phone 519-661-02111 ext 85344; email: fbeier@uwo.ca

19

20

21

22

23

24

25

26

27

28

29

30

31 The authors have no conflicts of interest to declare.

32

33 **ABSTRACT**

34

35 **Background:** Osteoarthritis (OA) is the most common form of arthritis and characterized by  
36 degeneration of articular cartilage. Mitogen-inducible gene 6 (Mig-6) has been identified as a  
37 negative regulator of the Epidermal Growth Factor Receptor (EGFR). Cartilage-specific *Mig-6*  
38 knockout (KO) mice display increased EGFR signaling, an anabolic buildup of articular cartilage  
39 and formation of chondro-osseous nodules. Since our understanding of the EGFR/Mig-6 network  
40 in cartilage remains incomplete, we characterized mice with cartilage-specific overexpression of  
41 Mig-6 in this study.

42 **Methods:** Utilizing knee joints from cartilage-specific *Mig-6* overexpressing (*Mig-6<sup>over/over</sup>*) mice  
43 (at multiple time points), we evaluated the articular cartilage using histology,  
44 immunohistochemical staining and semi-quantitative OARSI scoring at multiple ages. MicroCT  
45 analysis was employed to examine skeletal morphometry, body composition, and bone mineral  
46 density.

47 **Results:** Our data show that cartilage-specific *Mig-6* overexpression did not cause any major  
48 developmental abnormalities in articular cartilage, although *Mig-6<sup>over/over</sup>* mice have slightly  
49 shorter long bones compared to the control group. Moreover, there was no significant difference  
50 in bone mineral density and body composition in any of the groups. However, our results indicate  
51 that *Mig-6<sup>over/over</sup>* male mice show accelerated cartilage degeneration at 12 and 18 months of age.  
52 Immunohistochemistry for SOX9 demonstrated that the number of positively stained cells in *Mig-6<sup>over/over</sup>*  
53 mice decreased relative to controls. Immunostaining for MMP13 staining is increased in  
54 areas of cartilage degeneration in *Mig-6<sup>over/over</sup>* mice. Moreover, staining for phospho-EGFR (Tyr-  
55 1173) and lubricin (PRG4) was decreased in the articular cartilage of *Mig-6<sup>over/over</sup>* mice.  
56 **Conclusion:** Overexpression of *Mig-6* in articular cartilage causes no major developmental  
57 phenotype; however these mice develop earlier OA during aging. These data demonstrate that  
58 Mig-6/EGFR pathways is critical for joint homeostasis and might present a promising therapeutic  
59 target for OA.

60

61

62

63

## 64 INTRODUCTION

65 Osteoarthritis (OA), a chronic degenerative joint disease, is the most common form of  
66 arthritis. OA affects nearly five million Canadians currently (1), but that number will grow to more  
67 than 10 million by 2040 (2). This statistic is alarming, considering the disability, the loss of quality  
68 of life, and the costs to the health system generated by OA. Currently, there are pharmacological  
69 treatments available to manage OA symptoms such as pain (3–5) as well as surgical joint  
70 replacement at the end stage of disease (6,7). Unfortunately however, there is no cure for OA.  
71 Progressive understanding of the pathophysiology of OA suggests that the disease is a  
72 heterogeneous condition, so further research is needed to direct the clinical approaches to disease  
73 management (8).

74 Recent studies have shown that OA is a multifactorial disease of the whole joint, however  
75 its pathogenesis remains still poorly understood (9). Genetic, environmental, and biomechanical  
76 factors can accelerate the onset of OA (10). Articular cartilage is a highly specialized tissue that  
77 forms the smooth gliding surface of synovial joints, with chondrocytes as the only cellular  
78 component of cartilage (11). The homeostasis of the cartilage extracellular matrix (ECM) involves  
79 a dynamic equilibrium between anabolic and catabolic pathways controlled by chondrocytes (12).  
80 The progression of OA is associated with dramatic alteration in the integrity of the cartilage ECM  
81 network formed by a large number of proteoglycans (mostly aggrecan), collagen II, and other non-  
82 collagenous matrix proteins (13). In addition, ECM synthesis is regulated by a number of  
83 transcriptional regulators involved in chondrogenesis, specifically Sex- determining- region-Y  
84 Box 9 (SOX9), L-SOX 5 and SOX6 that regulate type II collagen (*Col2a1*) and Aggrecan (*Acan*)  
85 gene expression (14). On the other hand, catabolic events are dominant in OA and cells are exposed  
86 to degenerative enzymes such as aggrecanases (e.g. ADAMTS-4, -5) (13,15), collagenases (e.g.  
87 MMP-1,-3, -8, -13) (16), and gelatinases (e.g. MMP-2, and MMP-9), all of which have implications  
88 in articular cartilage degeneration (17). A number of growth factors (18) play a role in OA  
89 pathology, such as transforming growth factor- $\beta$  (19), BMP-2 (20), Insulin growth factor 1 (IGF-  
90 1) (21) fibroblast growth factor (FGF) and others, but the exact regulation of chondrocyte  
91 physiology is still not completely understood.

92 Recent studies in our laboratory (22,23) have identified the epidermal growth factor  
93 receptor (EGFR) and its ligand transforming growth factor alpha ( $TGF\alpha$ ) as possible mediators of  
94 cartilage degeneration (24–26). The human *TGFA* gene locus was also strongly linked to hip OA  
95 and cartilage thickness in genome-wide association studies (27,28).  $TGF\alpha$  stimulates EGFR

96 signaling and activates various cell-signaling pathways in chondrocytes, including extracellular  
97 signal-regulated kinase 1 and 2 (ERK1/2) and P13K (phosphoinositide 3-kinase) (29). EGFR  
98 signaling plays important roles in endochondral ossification (30,31), growth plate development  
99 (30) and cartilage maintenance and homeostasis (32–34), but many aspects of its action in cartilage  
100 are still not well understood. However, both protective and catabolic effects of EGFR signaling in  
101 OA have been reported, suggesting context-specific roles of this pathway (35).

102 Mitogen-inducible gene 6 (Mig-6) is also known as Gene 33, ErbB receptor feedback  
103 inhibitor 1 (ERRF1), or RALT, and is found in the cytosol (36). *Mig-6* protein binds to and inhibits  
104 EGFR signaling through a two-tiered mechanism: suppression of EGFR catalytic activity and  
105 receptor down-regulation (37). Interestingly, various studies have reported that loss of Mig-6  
106 induces the onset of OA-like symptoms in mice (36,38–40). Cartilage-specific (Col2-Cre)  
107 knockout of *Mig-6* mice results in formation of chondro-osseous nodules in the knee, but also  
108 increased thickness of articular cartilage in the knee, ankle, and elbow (41). Prx1-cre-mediated  
109 knockout of *Mig-6* results in a similar phenotype as that observed in cartilage-specific knockout  
110 mice(42). These phenotypes appeared to be caused by an increase in chondrocyte proliferation in  
111 articular cartilage, supported by increased expression of Sox9 and EGFR activation in cartilage  
112 (42). Since our studies suggest dosage- and/or context-specific roles of EGFR signaling in the  
113 process of cartilage degeneration in OA, in this study we used a Col2a1 promoter–driven Cre/lox  
114 system to examine effects of Mig-6 overexpression specifically in articular cartilage.

115

## 116 **Materials and Methods**

### 117 **Generation of Mig-6 overexpression mice**

118 *Mig-6* overexpression animals on a mixed C57Bl/6 and agouti mouse background, with the  
119 overexpression cassette in the Rosa26 locus (43) and bred for 10 generations into a C57Bl/6  
120 background. Transcription of *Mig-6* is under the control of a ubiquitously expressed chicken beta  
121 actin-cytomegalovirus hybrid (CAGGS) promoter, but blocked by a “Stop Cassette” flanked by  
122 LoxP sites (LSL) (43). *Mig-6* overexpression mice were bred to mice carrying the Cre recombinase  
123 gene under the control of the Collagen 2 promoter (44), to induce recombination and removal of  
124 the Stop Cassette specifically in cartilage. Throughout the manuscript, animals for homozygote  
125 overexpression of Mig-6 from both alleles are termed *Mig-6<sup>over/over</sup>* (*Mig-6<sup>over/over</sup>Col2a1-Cre<sup>+/-</sup>*),  
126 while control mice are identical but without the Cre gene (noted as “control” in this manuscript for  
127 simplicity). Mice were group housed (at least 1 pair of littermate matched control and

128 overexpression animals), on a standard 12 hour light/dark cycle, without access to running wheels,  
129 and with free access to mouse chow and water. Animals were weighed prior to euthanization by  
130 asphyxiation with CO<sub>2</sub>. All animal experiments were done in accordance with the Animal Use  
131 Subcommittee at the University of Western Ontario and conducted in accordance with guidelines  
132 from the Canadian Council on Animal Care.

133

### 134 **Genotyping**

135 Genotype was determined by polymerase chain reaction (PCR) analysis using DNA  
136 processed from biopsy samples of ear tissue from mice surviving to at least 21 days of age. PCR  
137 strategy: Primer set P1 and P2 can amplify a 300 bp fragment from the wild-type allele, whereas  
138 P1 and P3 can amplify a 450 bp fragment from the targeted ROSA26 locus allele (43) (Supp.  
139 Figure/Table 1).

140

### 141 **Histopathology of the knee**

142 Limbs from *Mig-6*<sup>over/over</sup> and control mice were harvested and fixed in 4%  
143 paraformaldehyde (Sigma) for 24 hours and decalcified in ethylenediaminetetraacetic acid (5%  
144 EDTA in phosphate buffered saline (PBS), pH 7.0. Joints were processed and embedded in  
145 paraffin in sagittal or frontal orientation, with serial sections taken at a thickness of 5 µm. Sections  
146 were stained with Toluidine Blue (0.04% toluidine blue in 0.2M acetate buffer, pH 4.0, for 10  
147 minutes) for glycosaminoglycan content and general evaluation of articular cartilage. All images  
148 were taken with a Leica DFC295 digital camera and a Leica DM1000 microscope.

### 149 **Thickness of proximal tibia growth plate**

150 For early developmental time points such as newborn (P0), sagittal knee sections stained  
151 with toluidine blue were used to measure the width of the zones of the epiphyseal growth plate in  
152 the proximal tibia. The average thickness of the resting and proliferative zones combined was  
153 evaluated by taking three separate measurements at approximately equal intervals across the width  
154 of the growth plate. The average hypertrophic zone thickness was also measured using 3 different  
155 measurements across the width of the growth plate, starting each measurement at the border of the  
156 proliferative and hypertrophic zones and ending at the subchondral bone interface. A third average  
157 measurement was then taken of the thickness of the entire growth plate. ImageJ Software (v.1.51)  
158 (45) was used for all measures, with the observer blinded to the genotype.

## 159 **Articular cartilage evaluation**

160 Articular cartilage thickness was measured from toluidine blue-stained frontal sections by  
161 a blinded observer. Articular cartilage thickness was measured separately for the non-calcified  
162 articular cartilage (measured from the superficial tangential zone to the tidemark) and the calcified  
163 articular cartilage (measured from the subchondral bone to the tidemark) across three evenly  
164 spaced points from all four quadrant of the joint (medial/lateral tibia and femur) in 4 sections  
165 spanning at least 500  $\mu\text{m}$ . ImageJ Software (v.1.51) (45) was used to measure the thickness of  
166 articular cartilage.

## 167 **Micro-Computerized Tomography ( $\mu\text{CT}$ )**

168 Whole body scans were collected in 6 week-, 11 week-, 12 month- and 18 month-old  
169 control and *Mig-6*<sup>over/over</sup> male and female mice. Mice were euthanized and imaged using General  
170 Electric (GE) SpeCZT microCT machine (46) at a resolution of 50 $\mu\text{m}$ /voxel or 100 $\mu\text{m}$ /voxel. GE  
171 Healthcare MicroView software (v2.2) was used to generate 2D maximum intensity projection and  
172 3D isosurface images to evaluate skeletal morphology. MicroView was used to create a line  
173 measurement tool in order to calculate the bone lengths, femurs lengths were calculated from the  
174 proximal point of the greater trochanter to the base of the lateral femoral condyle. Tibiae lengths  
175 were measured from the midpoint medial plateau to the medial malleolus. Humerus lengths were  
176 measured from the midpoint of the greater tubercle to the center of the olecranon fossa.

177

## 178 **Body Composition Analysis**

179 MicroView software (GE Healthcare Biosciences) was used to analyse the microCT scans  
180 at the resolution of 100 $\mu\text{m}$ /voxel. Briefly, the region of interest (ROI) was used to calculate the  
181 mean of air, water and an epoxy-based, cortical bone-mimicking calibrator (SB3; Gammex,  
182 Middleton, WI, USA) (1100 $\text{mg}/\text{cm}^3$ ) (47). A different set of global thresholds was applied to  
183 measure adipose, lean and skeletal mass (-275, -40 and 280 Hounsfield Units (HU),  
184 respectively). Moreover, bone mineral density (BMD) was acquired as the ratio of the average HU  
185 (from the value of skeletal region of interest) in order to calculate HU value of the SB3 calibrator,  
186 multiplied by the known density of the SB3 as described (46).

187

## 188 **OARSI histopathology scoring**

189 Serial sections through the entire knee joint were scored according to the OARSI

190 histopathology scoring system (48) by two blinded observers on the four quadrants of the knee:  
191 lateral femoral condyle (LFC), lateral tibial plateau (LTP), medial femoral condyle (MFC), and  
192 medial tibial plateau (MTP). Histologic scoring from 0-6 represent the OA severity, from 0  
193 (healthy cartilage) to 6 (erosion of more than 75% of articular cartilage). Individual scores are  
194 averaged across observers and OA severity is shown as described for each graph. Scores were  
195 compared between male and female *Mig-6*<sup>over/over</sup> and control mice at both 12 and 18 months of  
196 age. All images were taken with a Leica DFC295 digital camera and a Leica DM1000 microscope.

### 197 **Immunohistochemistry**

198 Frontal paraffin sections of knees were used to for immunohistochemical analysis, with  
199 slides with 'no primary antibody' as control. All sections were deparaffinized and rehydrated as  
200 previously described (41,49). Subsequently, the sections were incubated in 3% H<sub>2</sub>O<sub>2</sub> in methanol  
201 for 15 minutes to inhibit endogenous peroxidase activity. After rising with water, 5% goat or  
202 donkey serum in PBS was applied to reduce nonspecific background staining. Sections were  
203 incubated overnight at 4°C with primary antibodies against SOX9 (R&D Systems, AF3075),  
204 MMP13 (Protein Tech, Chicago, IL, USA, 18165-1-AP), lubricin (Abcam, ab28484) and  
205 phospho-EGFR (phosphoTyr-1173; Cell Signaling Technology). After washing, sections were  
206 incubated with horseradish peroxidase (HRP)-conjugated donkey anti-goat or goat anti-rabbit  
207 secondary antibody (R&D system and Santa Cruz), before incubation with diaminobenzidine  
208 substrate as a chromogen (Dako, Canada). Finally, sections were counterstained with 0.5% methyl  
209 green (Sigma) and mounted. Cell density of articular cartilage chondrocytes from 6 and 11 weeks-  
210 old male mice was determined by counting all lacunae with evidence of nuclear staining in the  
211 lateral and medial femur/tibia using a centered region of interest measuring 200 µm wide and 70  
212 µm deep from the articular surface by a blinded observer. For newborn (P0) animals the region of  
213 interest measured 200 µm wide and 100 µm deep from the proliferative zone.

### 214 **Statistical Analysis**

216 All statistical analyses were performed using GraphPad Prism (v6.0). Differences between  
217 two groups were evaluated using Student's *t*-test, and Two-Way ANOVA was used to compare 4  
218 groups followed by a Bonferroni multiple comparisons test. All *n* values represent the number of  
219 mice used in each group/genotyping.

220



## 221 **RESULTS**

### 222 **Overexpression of Mig-6 has minor effects on skeletal phenotypes during development**

223 We bred mice for conditional overexpression of Mig-6 (43) to mice expressing Cre  
224 recombinase under control of the collagen II promoter. Homozygote mice overexpressed Mig-6 in  
225 all collagen II-producing cells (and their progeny) from both Rosa26 alleles and are referred to as  
226 *Mig-6<sup>over/over</sup>* from here on. Control mice do not express Cre. Genomic DNA was extracted from  
227 ear notches to identify homozygous mice *Mig-6<sup>over/over</sup>* using standard PCR analysis.  
228 Overexpressing mice were obtained at the expected Mendelian ratios (data not shown). Male  
229 mutant gained weight at the same rate as controls over the examined at 10 week period, while  
230 female *Mig-6<sup>over/over</sup>* mice were slightly lighter than controls starting at 8 weeks of age (Fig. 1A,B).  
231 These differences persisted at 12 months of age for female mice, while at 18 months both male  
232 and female mutant mice were lighter than their controls (Fig. 1C,D).

233 Growth plates of post-natal day 0 (P0) *Mig-6<sup>over/over</sup>* and control mice were analyzed by  
234 histology. No major differences in tibia growth plate architecture were seen between genotypes  
235 (Fig. 2A). While the length of the total growth plate was slightly reduced in *Mig-6<sup>over/over</sup>* mice,  
236 differences in lengths of either the combined resting/proliferative or hypertrophic zones were not  
237 statistically significant (Fig. 2B-D).

238

### 239 **Mice overexpressing Mig-6 have shorter long bones than control mice**

240 Skeletal morphology and bone length were examined by microCT mice at the ages of 6  
241 and weeks, and 12 and 18 months. Scans of *Mig-6<sup>over/over</sup>* male and female mice and their controls  
242 were used to generate 3D isosurface reconstructions of 100 $\mu$ m/voxel uCT scans, in order to  
243 measure long bones lengths (femurs, humeri, and tibiae) in GE MicroView v2.2 software. Mutant  
244 bones were slightly shorter throughout life, with the exception of the male humeri at 12 months  
245 that did not show any statistically significant difference (Fig. 3). In contrast, male mice did not  
246 show any differences in bone mineral density at 11 weeks, 12 months, or 18 months, compared to  
247 controls (Suppl. Fig. 2). In addition, no differences in body mass composition were seen in male  
248 mutant and control mice at 11 weeks, 12 months, and 18 months of age (Suppl. Fig. 3).

249

### 250 **Mig-6 overexpressing mice have healthy articular cartilage during skeletal maturity**

251 We next examined articular cartilage morphology in 11 week-old mutant and control mice  
252 using toluidine blue stained paraffin frontal knee sections (Fig. 4A-B). The average thickness of



253 the calcified articular cartilage and non-calcified articular cartilage in the lateral femoral condyle  
254 (LFC), lateral tibial plateau (LTP), medial femoral condyle (MFC), and medial tibial plateau  
255 (MTP) from control and *Mig-6<sup>over/over</sup>* male (Fig. 4C-D) and female (Suppl. Fig. 4A-D) mice did  
256 not show statistically significant differences. Histological analyses of knee sections from male  
257 and female mice did not show any loss of proteoglycan, fibrillation or erosion in the articular  
258 cartilage of mutant mice.

259

### 260 **Overexpression of Mig-6 in cartilage induces an osteoarthritis-like phenotype in mice during** 261 **aging**

262 Since aging is a primary risk factor in OA (50), we next examined knee joints in 12 and 18 month-  
263 old control and *Mig-6<sup>over/over</sup>* mice. Toluidine blue stained sections were evaluated by two blinded  
264 observers, using OARSI recommendations (48). At 12 month of age, male control mice showed  
265 minor signs of cartilage damage, such as loss of proteoglycan staining, but no significant structural  
266 degeneration (Fig. 5A). However, seven of nine *Mig-6<sup>over/over</sup>* male mice showed more extensive  
267 cartilage damage in their medial side (erosion to the calcified layer lesion for 25% to 50% of the  
268 medial quadrant). OARSI scoring confirmed increased OA-like damage in mutant mice (Fig. 5C).  
269 Similarly, at 18 months of age the male control group showed minimal cartilage degeneration in 3  
270 of 6 mice (Fig. 6A). *Mig-6<sup>over/over</sup>* male mice showed more severe cartilage erosion in the medial  
271 tibial plateau in 4/6 animals. This result was again supported by significantly increased OARSI  
272 cartilage damage scores (Fig. 6C). Moreover, for the female group at 12 months, control mice did  
273 not show cartilage damage in any quadrant of the knee. *Mig-6<sup>over/over</sup>* female mice showed sign of  
274 OA-like cartilage damage in 3/8 animals (Supplementary Fig. 5). In addition, at 18 months of age,  
275 female control mice showed healthy cartilage, and 4/8 *Mig-6<sup>over/over</sup>* female mice showed some  
276 proteoglycan loss and cartilage degeneration on the medial side (Supplementary Fig. 6).

### 277 **Overexpression of Mig-6 decreases EGFR phosphorylation and Sox9 expression**

278 Since Mig-6 negatively regulates EGFR signaling (32,33,41), immunohistochemistry was  
279 performed for phospho-EGFR (Tyr-1173) (pEGFR), with no primary antibody controls. Frontal  
280 knee sections from 11 weeks-old male *Mig-6<sup>over/over</sup>* mice showed decreased pEGFR staining in  
281 the medial compartment in the knee joint (Fig.7), as expected upon Mig-6 overexpression.

282 During chondrogenesis, the transcription factor SOX9 is required for cartilage formation  
283 and normal expression of collagen and aggrecan (51). Sagittal and frontal sections of paraffin

284 embedded knees from post-natal day 0 (P0), 6 weeks-old, 11 weeks-old, 12 months and 18 months  
285 male mice were used for SOX9 immunostaining. At P0, nuclear SOX9 expression was observed  
286 in the resting and proliferative zone of the growth plate in both genotypes (Fig. 8A,B). Cell density  
287 was not different between genotypes (Fig. 8C). In control mice, 78 % of chondrocytes were  
288 positive for SOX 9 immunostaining, while the proportion of positive cells was only 53 % in *Mig-*  
289 *6<sup>over/over</sup>* mice (Fig 8D). In 6 and 11-weeks-old mice, SOX9 was present in the articular cartilage  
290 in all four quadrants (Fig. 9A,B). At 6 weeks-old the total cell number in control male and *Mig-*  
291 *6<sup>over/over</sup>* mice is similar (Fig. 9C), but the percentage of SOX9 positive cells was decreased in  
292 mutant mice (Fig 9D). A similar phenotype was present at 11 weeks (Supplementary Fig 7). At 12  
293 months of age, SOX9 is present more in the lateral side (LTP and LFC) than the medial side (MTP  
294 and MFC) in both strains, with a few positive cells present in the medial side of the control strain.  
295 On the other hand, *Mig-6<sup>over/over</sup>* mice showed fewer SOX9-positive cells on the medial side due  
296 the articular cartilage damage (Fig 10). Similar results were found at 18 month of age in *Mig-6*  
297 *over/over* with decreased SOX9 immunostaining in their medial side compared to the control (data  
298 not shown). For all ages, negative controls did not show staining in chondrocytes.

299

### 300 **Overexpression of Mig-6 decreases expression of lubricin**

301 Lubricin (aka PRG4/superficial zone protein) is a proteoglycan that plays an important role  
302 as lubricant in the joint (52). EGFR signaling is crucial for the cartilage lubrication function and  
303 regulates the induction of *Prg4* expression which is necessary for smooth movement (33,53).  
304 Immunohistochemistry for Lubricin in 11 week-old and 12 months-old animals demonstrated less  
305 staining in the superficial zone of the medial side of *Mig-6<sup>over/over</sup>* mice than in the control group  
306 (Fig.11 and Fig. 12).

307

### 308 **MMP13 immunostaining is similar in Mig-6-overexpressing and control mice**

309 Matrix metalloproteinase (MMP) 13 is highly expressed in OA (54,55). Frontal sections of  
310 knees from 12- and 18-month-old control and *Mig-6<sup>over/over</sup>* male mice were used for MMP13  
311 immunohistochemistry. At 12 months, pericellular staining was observed in the lateral articular  
312 cartilage of male mice from both genotypes, along with the expected subchondral bone staining  
313 (Fig. 13). Less staining was observed on the medial side of control mice while advanced cartilage  
314 degeneration in mutant mice precluded staining. Negative controls did not show staining in  
315 cartilage or subchondral bone. Articular cartilage from 18 months-old mice showed similar

316 staining patterns and intensity of MMP13 immunostaining in the lateral side of both genotypes,  
317 however in the medial side of *Mig-6<sup>over/over</sup>* mice, MMP13 staining is seen on the cartilage surface  
318 (lesion sites) and also observed in the subchondral bone (data not shown).

319

## 320 Discussion

321 The maintenance of articular cartilage homeostasis relies on a dynamic equilibrium  
322 involving growth factors (56), genetics (57), mechanical forces (58), obesity and injury, that all  
323 play a role in the onset of osteoarthritis (59). Better understanding of the underlying molecular  
324 mechanism is required to design therapies for preventing progression of OA. Recent studies from  
325 our laboratory and others have identified the epidermal growth factor receptor (EGFR) and Mig-6  
326 as possible mediators of articular cartilage homeostasis (35,41,53,60). *Mig-6* is a cytosolic protein  
327 and negative feedback regulator of EGFR signalling (61); thus, *Mig-6* can be a potential tumor  
328 suppressor (43,62–65). In addition, whole body knockout of the *Mig-6* gene in mice results in  
329 degenerative joint disease (38). We also have shown previously that constitutive cartilage-specific  
330 deletion of *Mig-6* (*Mig-6* KO) results in increased articular cartilage thickness and cell density in  
331 the joints of 12 week-old mice (41). Cartilage-specific *Mig-6* KO mice show the same anabolic  
332 effect in joint cartilage at 21 months of age (unpublished).

333 Previous research demonstrates that Mig-6 overexpression acts as a negative feedback  
334 regulator of EGFR-ERK signalling (43), however these studies did not yet analyze joint tissues.  
335 Since our studies suggest dosage- and/or context-specific roles of EGFR signaling in joint  
336 homeostasis and OA (35), we now examined whether overexpression of Mig-6 alters these  
337 processes. Here, we report that cartilage-specific constitutive overexpression of *Mig-6* did not  
338 cause cartilage degeneration in young mice, but early onset OA in middle aged mice. While we  
339 observed some effects of Mig-6 overexpression on bone length and weight, these effects were  
340 subtle and not accompanied by major morphological or histological changes in growth plate  
341 cartilage, overall skeletal morphology, or body composition. A previous study showed that  
342 deletion of EGFR in bone tissue (*Coll-Cre Egr<sup>Wa5/f</sup>*) resulted in shorter femurs compared to wild-  
343 type mice (66), consistent with our findings. The EGFR network is essential during long bone  
344 development, since previous studies have shown that EGFR- or TGF $\alpha$ -deficient mice exhibit a  
345 widened zone of hypertrophic chondrocytes (24,67). Moreover, Qin and colleagues have shown  
346 that administration of the EGFR inhibitor, gefitinib, into 1-month-old rats results in an enlarged  
347 hypertrophic zone due down-regulation of MMP-9,-13 and -14 (31). Together these data suggest

348 a critical role of EGFR during endochondral ossification and elucidate downstream mechanism of  
349 EGFR (68). Further research is required to provide more evidence of EGFR/*Mig-6<sup>over/over</sup>*  
350 signalling during bone formation, but many of these effects are relatively subtle and transient, and  
351 likely unrelated to much more severe phenotypes observed later.

352 Histologically, our findings showed that mice with cartilage-specific *Mig-6* overexpressing  
353 showed healthy articular cartilage with no significant difference in articular cartilage thickness  
354 from control group at the ages of 6 weeks and 11 weeks. However, *Mig-6<sup>over/over</sup>* mice developed  
355 severe degeneration of articular cartilage with aging. More prevalent, the knee joints of *Mig-6*  
356 *over/over* male mice showed significantly advanced cartilage degeneration. The same pattern but  
357 with more severe damage, was seen in 18 month-old mice. As previously described, sex hormones  
358 play a role in OA disease where male mice develop more severe OA (69).

359 SOX9 is crucial in chondrogenesis during endochondral bone formation, articular cartilage  
360 development and cartilage homeostasis (51). Previous *in vivo* models using cartilage (Col2)-Cre  
361 or limb (Prx1)-Cre specific ablation of *Mig-6* showed increased expression of SOX9 in the  
362 articular cartilage. Also, TGF $\alpha$  suppresses expression of anabolic genes such as Sox9, type II  
363 collagen and aggrecan in primary chondrocytes (71). Interestingly, in the medial and lateral  
364 compartment of the knee joints of 6 and 11 week-old male *Mig-6<sup>over/over</sup>* mice, the percentage  
365 of SOX9- positive chondrocytes was decreased compared to controls, despite the absence of  
366 histological defects in articular cartilage. These data suggest that reduced number of Sox9-  
367 expressing cells precede the degeneration of articular chondrocytes in our mutant mice. The  
368 number of SOX9-expressing cells was also reduced in *Mig-6<sup>over/over</sup>* mice at later ages. These data  
369 suggest that reduced numbers of Sox9-expressing cells could be one cause of the advanced OA in  
370 our mutant mice. In addition, we observed decreased expression of lubricin/PRG4 in these joints,  
371 which might also contribute to the observed joint pathologies. PRG4 has been shown to be  
372 regulated by EGFR signaling before (42,53), in support of our findings.

373 While the EGFR is the best characterized substrate of Mig-6, other substrates have been  
374 described. Mig-6 binds to different proteins such as the cell division control protein 42 homolog  
375 (Cdc42) (72), c-Abl (73), and the hepatocyte growth factor receptor c-Met (74). While we cannot  
376 exclude that deregulation of these other substrates contributes to the observed phenotypes, the  
377 similarities of defects in our mice with those seen upon cartilage-specific deletion of EGFR suggest  
378 that decreased EGFR signaling is the main cause for the advanced OA observed in our mutant  
379 mice. Nevertheless, it will be important to determine whether signaling through cMet and other

380 pathways is altered as well.

381 In conclusion, we show for the first time that cartilage-specific Mig-6 overexpression in  
382 mice results in reduced EGFR activity in chondrocytes, reduced SOX9 and PRG4 expression , and  
383 accelerated development of OA. These data highlight the important and context-specific role of  
384 the EGFR-Mig-6 signaling pathway in joint homeostasis and point towards potential targeting of  
385 this pathway for OA therapy.

386

### 387 **Acknowledgements**

388 We would like to thank Julia Bowering for kindly performing articular cartilage sectioning  
389 and Dr. Michael Pest for his assistance in the blinded scoring of joints. M.B. was supported by a  
390 fellowship from CNPq/Brazil. Work in the lab of F.B. is supported by a grant from the Canadian  
391 Institutes of Health Research (Grant #332438). F.B. holds the Canada Research Chair in  
392 Musculoskeletal Research.

393

394

395

396

397

398

399

400

401

402

403

404

405

406

407

408

409

410

411 **BIBLIOGRAPHY**

- 412 1. Hunter, D. J., Schofield, D. & Callander, E. The individual and socioeconomic impact of  
413 osteoarthritis. *Nat. Rev. Rheumatol.* **10**, 437–441 (2014).
- 414 2. Bombardier C, Hawker G, M. D. The Impact Of Arthritis In Canada: Today And Over The  
415 Next 30 Years. (2011).
- 416 3. Kramer, W. C., Hendricks, K. J. & Wang, J. Pathogenetic mechanisms of posttraumatic  
417 osteoarthritis: Opportunities for early intervention. *Int. J. Clin. Exp. Med.* (2011).
- 418 4. Ruan, M. Z. *et al.* Treatment of osteoarthritis using a helper-dependent adenoviral vector  
419 retargeted to chondrocytes. *Mol. Ther. — Methods Clin. Dev.* **3**, 16008 (2016).
- 420 5. Sokolove, Jeremy and Lepus, C. M. Role of inflammation in the pathogenesis of  
421 osteoarthritis: latest findings and interpretations. *Ther Adv Musculoskel Dis* **5**, 77–94  
422 (2013).
- 423 6. Mcalindon, T. E. *et al.* OARSI guidelines for the non-surgical management of knee  
424 osteoarthritis. *Osteoarthr. Cartil.* **22**, 363–388 (2014).
- 425 7. Hunter, D. J. Osteoarthritis. *Best Pract. Res. Clin. Rheumatol.* **25**, 801–814 (2011).
- 426 8. Driban, J. B., Sitler, M. R., Barbe, M. F. & Balasubramanian, E. Is osteoarthritis a  
427 heterogeneous disease that can be stratified into subsets? doi:10.1007/s10067-009-1301-1
- 428 9. Gs, M. & Mologhianu G. *Osteoarthritis pathogenesis-a complex process that involves the*  
429 *entire joint. J. Med. Life* **7**,
- 430 10. Felson, D. T. Osteoarthritis as a disease of mechanics. (2012).  
431 doi:10.1016/j.joca.2012.09.012
- 432 11. Poole, A. R. *et al.* Composition and Structure of Articular Cartilage. *Clin. Orthop. Relat.*  
433 *Res.* **391**, S26–S33 (2003).
- 434 12. Saha, A. K. & Kohles, S. S. A cell-matrix model of anabolic and catabolic dynamics during  
435 cartilage biomolecule regulation. (2012). doi:10.1504/IJCIH.2012.046995
- 436 13. Goldring, M. B. *et al.* Cartilage homeostasis in health and rheumatic diseases. *Arthritis Res.*  
437 *Ther.* **11**, 224 (2009).
- 438 14. Yeung Tsang, K., Wa Tsang, S., Chan, D. & Cheah, K. S. E. The chondrocytic journey in  
439 endochondral bone growth and skeletal dysplasia. *Birth Defects Res. Part C - Embryo Today*  
440 *Rev.* **102**, (2014).
- 441 15. Gilbert, A. M., Bikker, J. A. & O’Neil, S. V. Advances in the development of novel



- 442           aggrecanase inhibitors. *Expert Opin. Ther. Pat.* **21**, 1–12 (2011).
- 443 16.   Parks, W. C., Wilson, C. L. & López-Boado, Y. S. Matrix metalloproteinases as modulators  
444       of inflammation and innate immunity. *Nat. Rev. Immunol.* **4**, 617–629 (2004).
- 445 17.   Yoon, Y. M. *et al.* Epidermal growth factor negatively regulates chondrogenesis of  
446       mesenchymal cells by modulating the protein kinase C-alpha, Erk-1, and p38 MAPK  
447       signaling pathways. *J. Biol. Chem.* **275**, 12353–9 (2000).
- 448 18.   Fortier Dvm, L. A., Barker, J. U., Strauss, E. J., Mccarrel, T. M. & Cole, B. J.  
449       SYMPOSIUM: CLINICALLY RELEVANT STRATEGIES FOR TREATING  
450       CARTILAGE The Role of Growth Factors in Cartilage Repair. doi:10.1007/s11999-011-  
451       1857-3
- 452 19.   Van Der Kraan, P. M. Differential Role of Transforming Growth Factor-beta in an  
453       Osteoarthritic or a Healthy Joint. (2018). doi:10.11005/jbm.2018.25.2.65
- 454 20.   Gamer, L. W. *et al.* The Role of *Bmp2* in the Maturation and Maintenance of the Murine  
455       Knee Joint. *J. Bone Miner. Res.* **33**, 1708–1717 (2018).
- 456 21.   Wei, F.-Y. *et al.* *Correlation of insulin-like growth factor 1 and osteoarthritic cartilage*  
457       *degradation: a spontaneous osteoarthritis in guinea-pig HHS Public Access. Eur Rev Med*  
458       *Pharmacol Sci* **21**, (2017).
- 459 22.   Appleton, C. T. G., Pitelka, V., Henry, J. & Beier, F. Global analyses of gene expression in  
460       early experimental osteoarthritis. *Arthritis Rheum.* **56**, 1854–1868 (2007).
- 461 23.   Appleton, C. T. G., Usmani, S. E., Bernier, S. M., Aigner, T. & Beier, F. Transforming  
462       growth factor alpha suppression of articular chondrocyte phenotype and Sox9 expression in  
463       a rat model of osteoarthritis. *Arthritis Rheum.* **56**, 3693–705 (2007).
- 464 24.   Usmani, S. E. *et al.* Transforming growth factor alpha controls the transition from  
465       hypertrophic cartilage to bone during endochondral bone growth. *Bone* **51**, 131–141 (2012).
- 466 25.   Appleton, C. T. G. *et al.* Reduction in disease progression by inhibition of transforming  
467       growth factor  $\alpha$ -CCL2 signaling in experimental posttraumatic osteoarthritis. *Arthritis*  
468       *Rheumatol. (Hoboken, N.J.)* **67**, 2691–701 (2015).
- 469 26.   Usmani, S. E. *et al.* Context-specific protection of TGF $\alpha$  null mice from osteoarthritis. *Sci.*  
470       *Rep.* **6**, 30434 (2016).
- 471 27.   Cui, G. *et al.* Association of Common Variants in TGFA with Increased Risk of Knee  
472       Osteoarthritis Susceptibility. *Genet. Test. Mol. Biomarkers* gtm.2017.0045 (2017).  
473       doi:10.1089/gtmb.2017.0045



- 474 28. Zengini, E. *et al.* Genome-wide analyses using UK Biobank data provide insights into the  
475 genetic architecture of osteoarthritis. *Nat. Genet.* 2018 1 (2018). doi:10.1038/s41588-018-  
476 0079-y
- 477 29. Appleton, C. T. G., Usmani, S. E., Mort, J. S. & Beier, F. Rho/ROCK and MEK/ERK  
478 activation by transforming growth factor-alpha induces articular cartilage degradation. *Lab.*  
479 *Invest.* **90**, 20–30 (2010).
- 480 30. Wang, K., Yamamoto, H., Chin, J. R., Werb, Z. & Vu, T. H. Epidermal growth factor  
481 receptor-deficient mice have delayed primary endochondral ossification because of  
482 defective osteoclast recruitment. *J. Biol. Chem.* **279**, 53848–56 (2004).
- 483 31. Zhang, X. *et al.* The critical role of the epidermal growth factor receptor in endochondral  
484 ossification. *J. Bone Miner. Res.* **26**, 2622–33 (2011).
- 485 32. Jia, H. *et al.* EGFR signaling is critical for maintaining the superficial layer of articular  
486 cartilage and preventing osteoarthritis initiation. doi:10.1073/pnas.1608938113
- 487 33. Shepard, J. B., Jeong, J.-W., Maihle, N. J., O'Brien, S. & Dealy, C. N. Transient anabolic  
488 effects accompany epidermal growth factor receptor signal activation in articular cartilage  
489 in vivo. *Arthritis Res. Ther.* **15**, R60 (2013).
- 490 34. Zhang, X. *et al.* Reduced EGFR signaling enhances cartilage destruction in a mouse  
491 osteoarthritis model. *Bone Res.* **2**, 14015 (2014).
- 492 35. Qin, L. & Beier, F. EGFR Signaling: Friend or Foe for Cartilage? *JBMR Plus* **3**, e10177  
493 (2019).
- 494 36. Jin, N., Gilbert, J. L., Broaddus, R. R., Demayo, F. J. & Jeong, J.-W. Generation of a Mig-  
495 6 conditional null allele. *Genesis* **45**, 716–21 (2007).
- 496 37. Frosi, Y. *et al.* A two-tiered mechanism of EGFR inhibition by RALT/MIG6 via kinase  
497 suppression and receptor degradation. *J. Cell Biol.* **189**, 557–71 (2010).
- 498 38. Zhang, Y.-W. *et al.* Targeted disruption of Mig-6 in the mouse genome leads to early onset  
499 degenerative joint disease. *Proc. Natl. Acad. Sci. U. S. A.* **102**, 11740–5 (2005).
- 500 39. Mateescu, R. G., Todhunter, R. J., Lust, G. & Burton-Wurster, N. Increased MIG-6 mRNA  
501 transcripts in osteoarthritic cartilage. *Biochem. Biophys. Res. Commun.* **332**, 482–6 (2005).
- 502 40. Joiner, D. M. *et al.* Accelerated and increased joint damage in young mice with global  
503 inactivation of mitogen-inducible gene 6 after ligament and meniscus injury. *Arthritis Res.*  
504 *Ther.* **16**, R81 (2014).
- 505 41. Pest, M. A., Russell, B. A., Zhang, Y.-W., Jeong, J.-W. & Beier, F. Disturbed cartilage and

- 506 joint homeostasis resulting from a loss of mitogen-inducible gene 6 in a mouse model of  
507 joint dysfunction. *Arthritis Rheumatol. (Hoboken, N.J.)* **66**, 2816–27 (2014).
- 508 42. Shepard, J. B., Jeong, J.-W., Maihle, N. J., O'Brien, S. & Dealy, C. N. Transient anabolic  
509 effects accompany epidermal growth factor receptor signal activation in articular cartilage  
510 in vivo. *Arthritis Res. Ther.* **15**, R60 (2013).
- 511 43. Kim, T. H. *et al.* Mig-6 suppresses endometrial cancer associated with pten deficiency and  
512 ERK activation. *Cancer Res.* **74**, 7371–7382 (2014).
- 513 44. Terpstra, L. *et al.* Reduced chondrocyte proliferation and chondrodysplasia in mice lacking  
514 the integrin-linked kinase in chondrocytes. *J. Cell Biol.* **162**, (2003).
- 515 45. Schneider, C. A., Rasband, W. S. & Eliceiri, K. W. NIH Image to ImageJ: 25 years of image  
516 analysis. *Nat. Methods* **9**, 671–675 (2012).
- 517 46. Beaucage, K. L., Pollmann, S. I., Sims, S. M., Dixon, S. J. & Holdsworth, D. W.  
518 Quantitative in vivo micro-computed tomography for assessment of age-dependent changes  
519 in murine whole-body composition. *Bone Reports* **5**, 70–80 (2016).
- 520 47. White, D. R. Tissue substitutes in experimental radiation physics. *Med. Phys.* **5**, 467–479  
521 (1978).
- 522 48. Glasson, S. S., Chambers, M. G., Van Den Berg, W. B. & Little, C. B. The OARSI  
523 histopathology initiative – recommendations for histological assessments of osteoarthritis  
524 in the mouse. *Osteoarthr. Cartil.* **18**, S17–S23 (2010).
- 525 49. Ratneswaran, A. *et al.* Peroxisome proliferator-activated receptor  $\delta$  promotes the  
526 progression of posttraumatic osteoarthritis in a mouse model. *Arthritis Rheumatol.*  
527 *(Hoboken, N.J.)* **67**, 454–64 (2015).
- 528 50. Zhang, M., Theleman, J. L., Lygrisse, K. A. & Wang, J. Experimental Section / Mini-  
529 Review Epigenetic Mechanisms Underlying the Aging of Articular Cartilage and  
530 Osteoarthritis. (2019). doi:10.1159/000496688
- 531 51. Lefebvre, V., Dvir-Ginzberg, M. & Hebrew, : SOX9 and the many facets of its regulation  
532 in the chondrocyte lineage HHS Public Access. *Connect Tissue Res* **58**, 2–14 (2017).
- 533 52. Waller, K. A. *et al.* Role of lubricin and boundary lubrication in the prevention of  
534 chondrocyte apoptosis. doi:10.1073/pnas.1219289110
- 535 53. Jia, H. *et al.* EGFR signaling is critical for maintaining the superficial layer of articular  
536 cartilage and preventing osteoarthritis initiation. *Proc. Natl. Acad. Sci. U. S. A.* 201608938  
537 (2016). doi:10.1073/pnas.1608938113

- 538 54. Wang, M. *et al.* MMP13 is a critical target gene during the progression of osteoarthritis.  
539 *Arthritis Res. Ther.* **15**, R5 (2013).
- 540 55. Goumans, K. *et al.* Osteoarthritis in Humans and Mice Elevated MMP-13 Expression in  
541 Increase in ALK1/ALK5 Ratio as a Cause for. *J Immunol Ref.* **182**, 7937–7945 (2009).
- 542 56. Mariani, E., Pulsatelli, L. & Facchini, A. Signaling pathways in cartilage repair. *Int. J. Mol.*  
543 *Sci.* **15**, 8667–98 (2014).
- 544 57. Lee, A. *et al.* A Current Review of Molecular Mechanisms Regarding Osteoarthritis and  
545 Pain. *Gene* **527**, 440–447 (2013).
- 546 58. Bader, D. L., Salter, D. M. & Chowdhury, T. T. Biomechanical influence of cartilage  
547 homeostasis in health and disease. *Arthritis* **2011**, 979032 (2011).
- 548 59. Richmond, S. A. *et al.* Are Joint Injury, Sport Activity, Physical Activity, Obesity, or  
549 Occupational Activities Predictors for Osteoarthritis? A Systematic Review. *J. Orthop.*  
550 *Sport. Phys. Ther.* **43**, 515-B19 (2013).
- 551 60. Zhang, X. *et al.* Reduced EGFR signaling enhances cartilage destruction in a mouse  
552 osteoarthritis model. *Bone Res.* **2**, 14015 (2014).
- 553 61. Hackel, P. O., Gishizky, M. & Ullrich, A. Mig-6 Is a Negative Regulator of the Epidermal  
554 Growth Factor Receptor Signal. *Biol. Chem.* **382**, (2001).
- 555 62. Maity, T. K. *et al.* Loss of MIG6 Accelerates Initiation and Progression of Mutant  
556 Epidermal Growth Factor Receptor-Driven Lung Adenocarcinoma. *Cancer Discov.* **5**, 534–  
557 49 (2015).
- 558 63. Li, Z. *et al.* Downregulation of Mig-6 in nonsmall-cell lung cancer is associated with EGFR  
559 signaling. *Mol. Carcinog.* **51**, 522–34 (2012).
- 560 64. Zhang, Y.-W. *et al.* Evidence that MIG-6 is a tumor-suppressor gene. *Oncogene* **26**, 269–  
561 276 (2007).
- 562 65. Sasaki, M., Terabayashi, T., Weiss, S. M. & Ferby, I. The Tumor Suppressor MIG6 Controls  
563 Mitotic Progression and the G2/M DNA Damage Checkpoint by Stabilizing the WEE1  
564 Kinase. *Cell Rep.* **24**, 1278–1289 (2018).
- 565 66. Zhang, X. *et al.* Epidermal growth factor receptor plays an anabolic role in bone metabolism  
566 in vivo. *J. Bone Miner. Res.* **26**, 1022–34 (2011).
- 567 67. Sabilia, M. *et al.* Correction: Mice humanised for the EGF receptor display hypomorphic  
568 phenotypes in skin, bone and heart. *Development* **143**, 4755–4755 (2017).
- 569 68. Zhang, X. *et al.* Epidermal Growth Factor Receptor (EGFR) Signaling Regulates

- 570 Epiphyseal Cartilage Development through  $\beta$ -Catenin-dependent and -independent  
571 Pathways. *J. Biol. Chem.* **288**, 32229–32240 (2013).
- 572 69. Ma, H.-L. *et al.* Osteoarthritis severity is sex dependent in a surgical mouse model.  
573 *Osteoarthr. Cartil.* **15**, 695–700 (2007).
- 574 70. Meakin, L. B. *et al.* Male mice housed in groups engage in frequent fighting and show a  
575 lower response to additional bone loading than females or individually housed males that  
576 do not fight. *Bone* **54**, 113–117 (2013).
- 577 71. Appleton, C. T. G., Usmani, S. E., Bernier, S. M., Aigner, T. & Beier, F. Transforming  
578 growth factor  $\alpha$  suppression of articular chondrocyte phenotype and Sox9 expression in a rat  
579 model of osteoarthritis. *Arthritis Rheum.* **56**, 3693–3705 (2007).
- 580 72. Jiang, X. *et al.* Inhibition of Cdc42 is essential for Mig-6 suppression of cell migration  
581 induced by EGF. *Oncotarget* (2016). doi:10.18632/oncotarget.10205
- 582 73. Hopkins, S. *et al.* Mig6 is a sensor of EGF receptor inactivation that directly activates c-Abl  
583 to induce apoptosis during epithelial homeostasis. *Dev. Cell* **23**, 547–59 (2012).
- 584 74. Pante, G. *et al.* Mitogen-inducible gene 6 is an endogenous inhibitor of HGF/Met-induced  
585 cell migration and neurite growth. *J. Cell Biol.* **171**, 337–48 (2005).
- 586
- 587
- 588

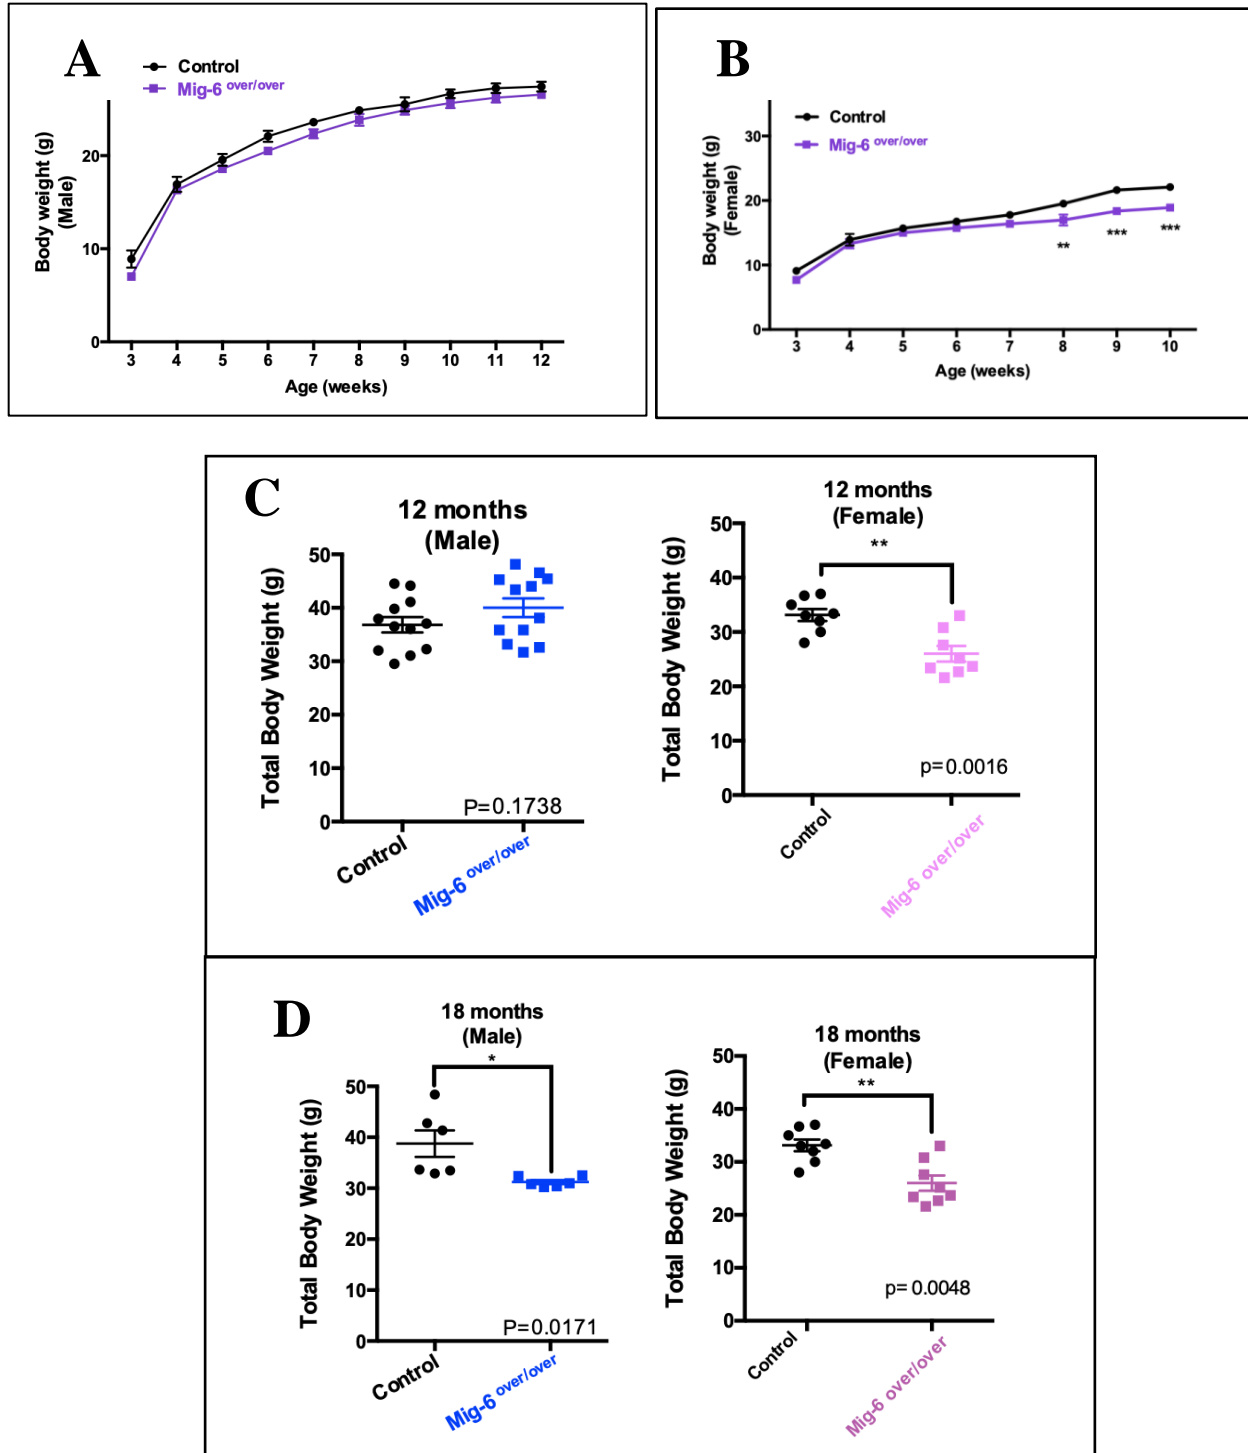

**Figure 1) Body weight of control and *Mig-6*<sup>over/over</sup> male and female mice during growth.**

Body weight of male *Mig-6* overexpression mice did not show any significant differences compared to control (A) Female *Mig-6* overexpression mice showed statistically significant differences compared to control at 8w, 9w and 10w (B). Two-Way ANOVA was used with Bonferroni post hoc analysis (n=5/genotyping). Data are presented with mean and error  $\pm$  SEM (P<0.05). Weights of 12 months old (C) and 18 months old (D) male and female cartilage specific

*Mig-6<sup>over/over</sup>* mice and controls taken immediately prior to sacrifice. Individual data points presented with mean  $\pm$  SEM ( $P < 0.05$ ). Data analyzed by two tailed student t-tests from 6-12 mice per group (age/genotyping).

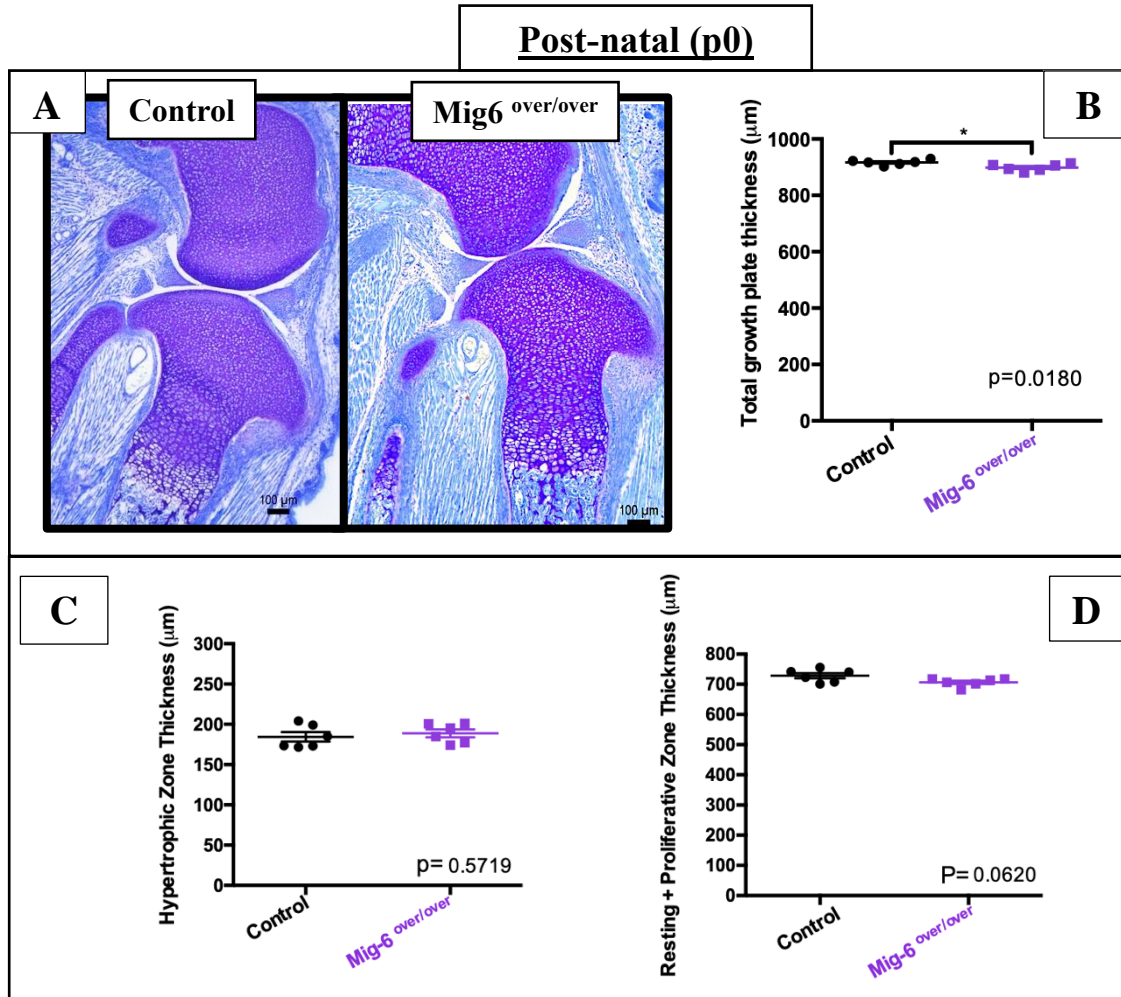

**Figure 2) Cartilage-specific Mig6-overexpressing mice display no major developmental phenotype.** Representative toluidine Blue staining on postnatal day 0 (P0) of *Mig-6<sup>over/over</sup>* (A) and control animals. Thickness of total proximal tibia growth plates in the mice containing articular cartilage specific mitogen inducible gene 6 overexpression ( $n=6$ ), when compared to age matched controls ( $n=6$ ) was significantly decreased when analyzed by two tailed student t-tests (B); The average of hypertrophic zone thickness from postnatal day 0 in the mice containing articular cartilage specific mitogen inducible gene 6 overexpression had mean of  $188.9 \mu\text{m}$  and control mice had mean of  $184.4 \mu\text{m}$  (C). The thickness of the combined resting and proliferative zones from the control had mean of  $728 \mu\text{m}$  and *Mig-6<sup>over/over</sup>*  $706.5 \mu\text{m}$  *Mig-6<sup>over/over</sup>* (D). Therefore, there was no significant differences within the groups. Individual data points presented with mean  $\pm$  SEM analyzed by two tailed student t-tests; ( $P < 0.05$ ).



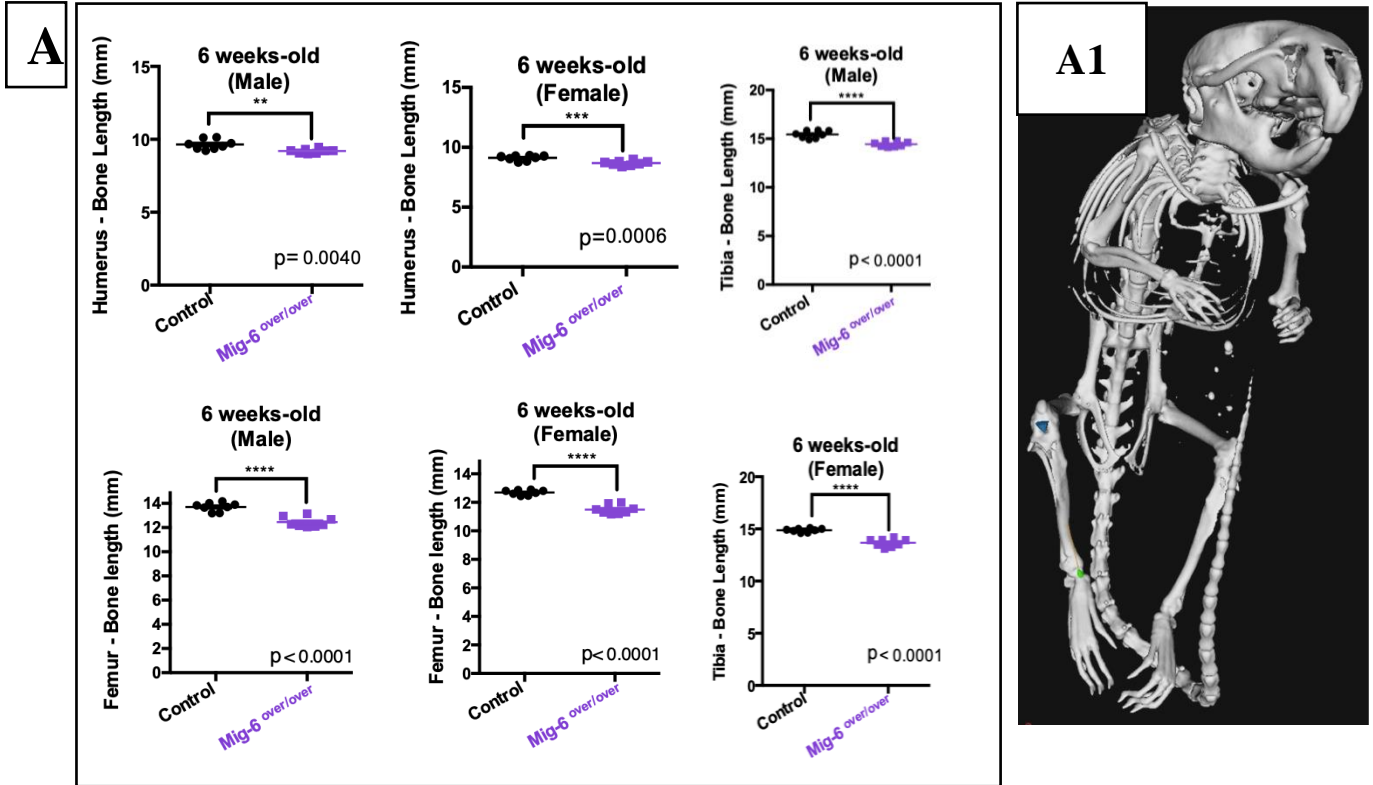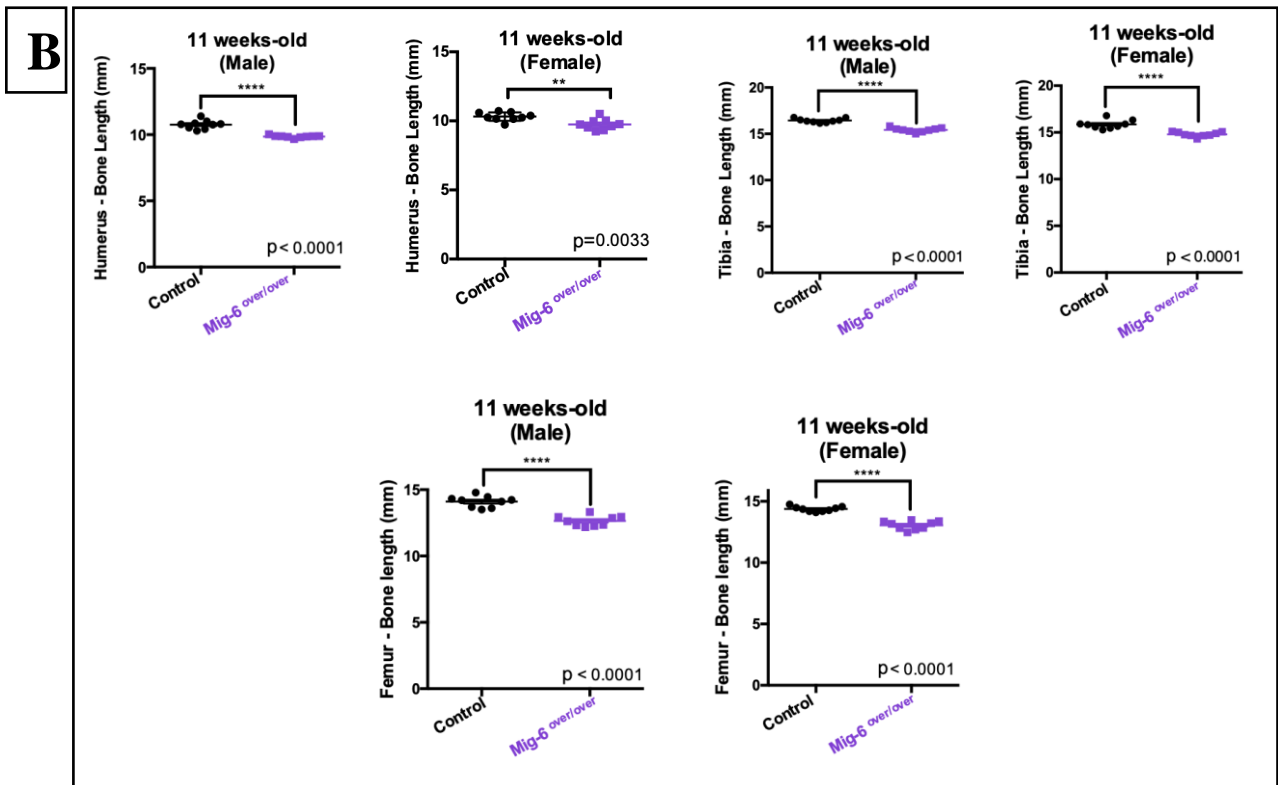



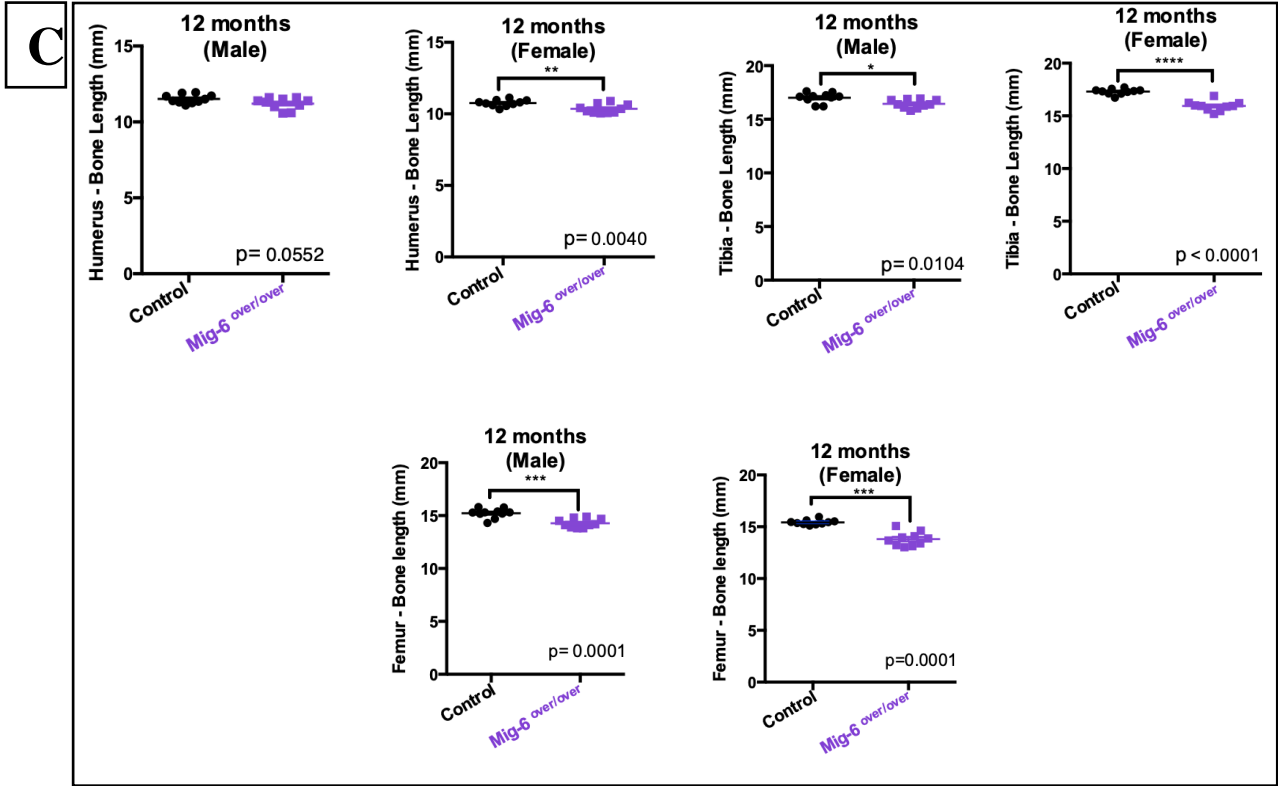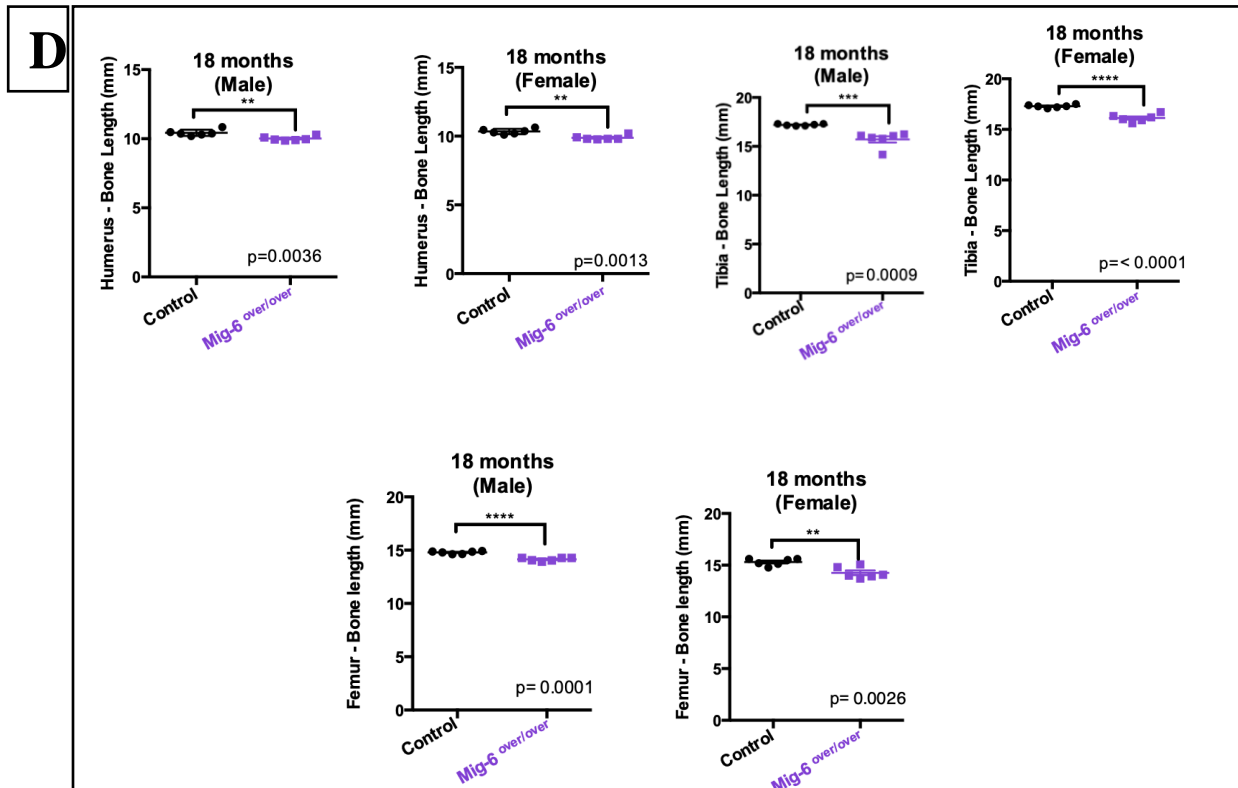

**Figure 3) Long bone lengths of *Mig-6* overexpression are significantly shorter than control long bone lengths during growth and aging.** The lengths of right humeri, tibiae and femora were measured on microCT scan of mice in each different time-points of age using GE MicroView software. **(A)** 6 weeks-old male and female control and *Mig-6* overexpressors. **(B)** 11 weeks-old male and female control and *Mig-6* overexpressors. **(C)** 12 months-old male and female control and *Mig-6* overexpressors. **(D)** 18 months-old male and female control and *Mig-6* overexpressors. **(A1)** Representative 3D isosurface reconstructions of 100 $\mu$ m/voxel  $\mu$ CT scans. There were statistically significant differences among control and *Mig-6*<sup>over/over</sup> male and female groups. Individual data points presented with mean  $\pm$  SEM ( $P < 0.05$ ). Data analyzed by two tailed student t-tests from 6-12 mice per group (age/gender).

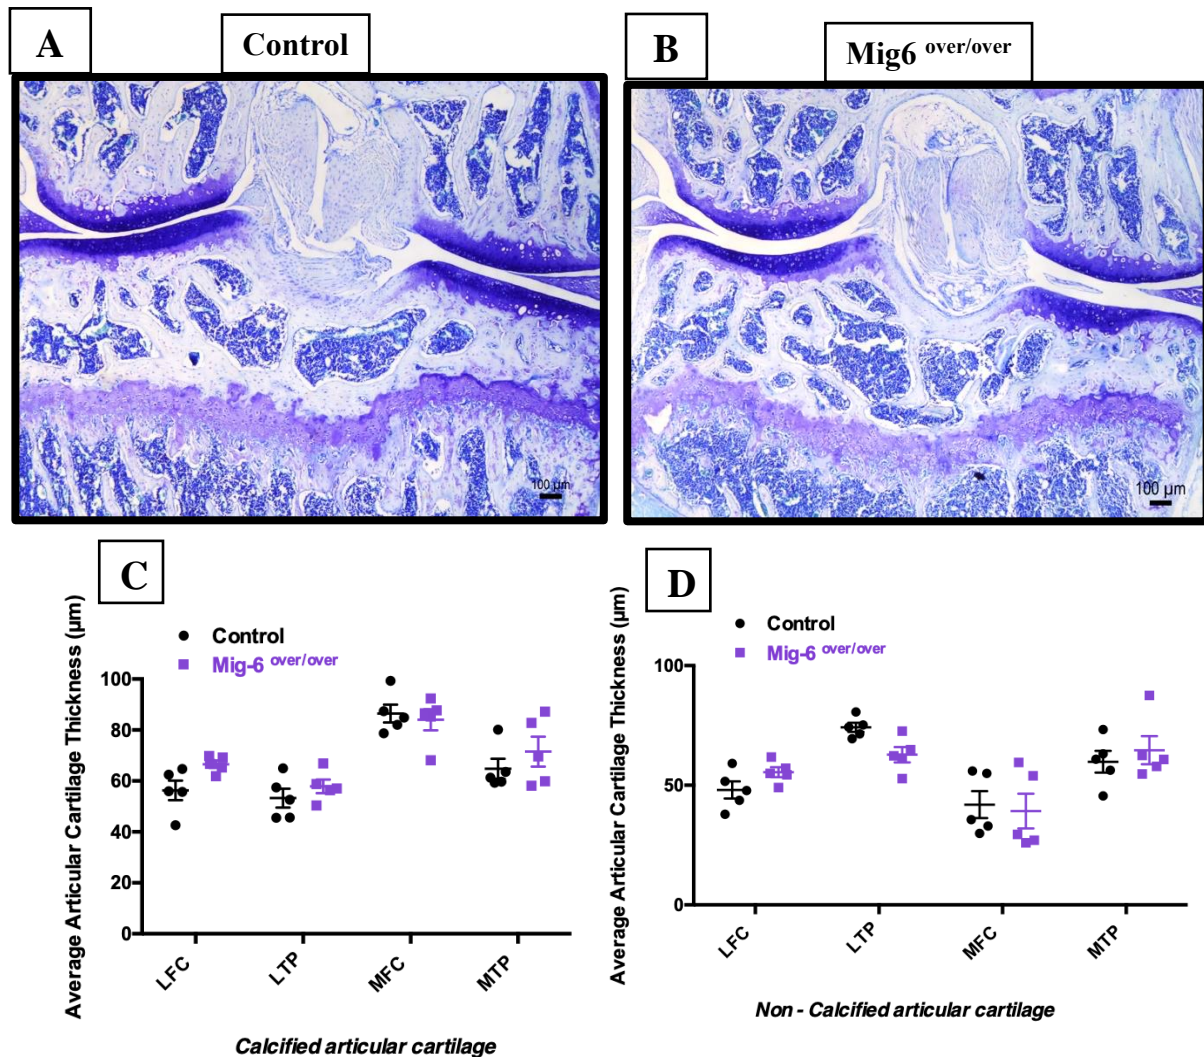

**Figure 4) Articular cartilage from 11 weeks-old *Mig-6*<sup>over/over</sup> male mice appeared healthy during skeletal maturity.** Representative ( $n=5$ /group, toluidine blue) stained frontal sections of knee joints from 11-week-old control **(A)** and *Mig-6* over **(B)**. *Mig-6* overexpressors mice show similar articular cartilage thickness when compared to controls at 11 weeks-old male mice. The average thickness of the calcified articular cartilage **(C)** and non-calcified articular cartilage **(D)**

in the lateral femoral condyle (LFC), lateral tibial plateau (LTP), medial femoral condyle (MFC), medial tibial plateau (MTP) was measured. Individual data points presented with mean  $\pm$  SEM. Data analyzed by two-way ANOVA (95% CI) with Bonferroni post-hoc test. Scale bar = 100 $\mu$ m.

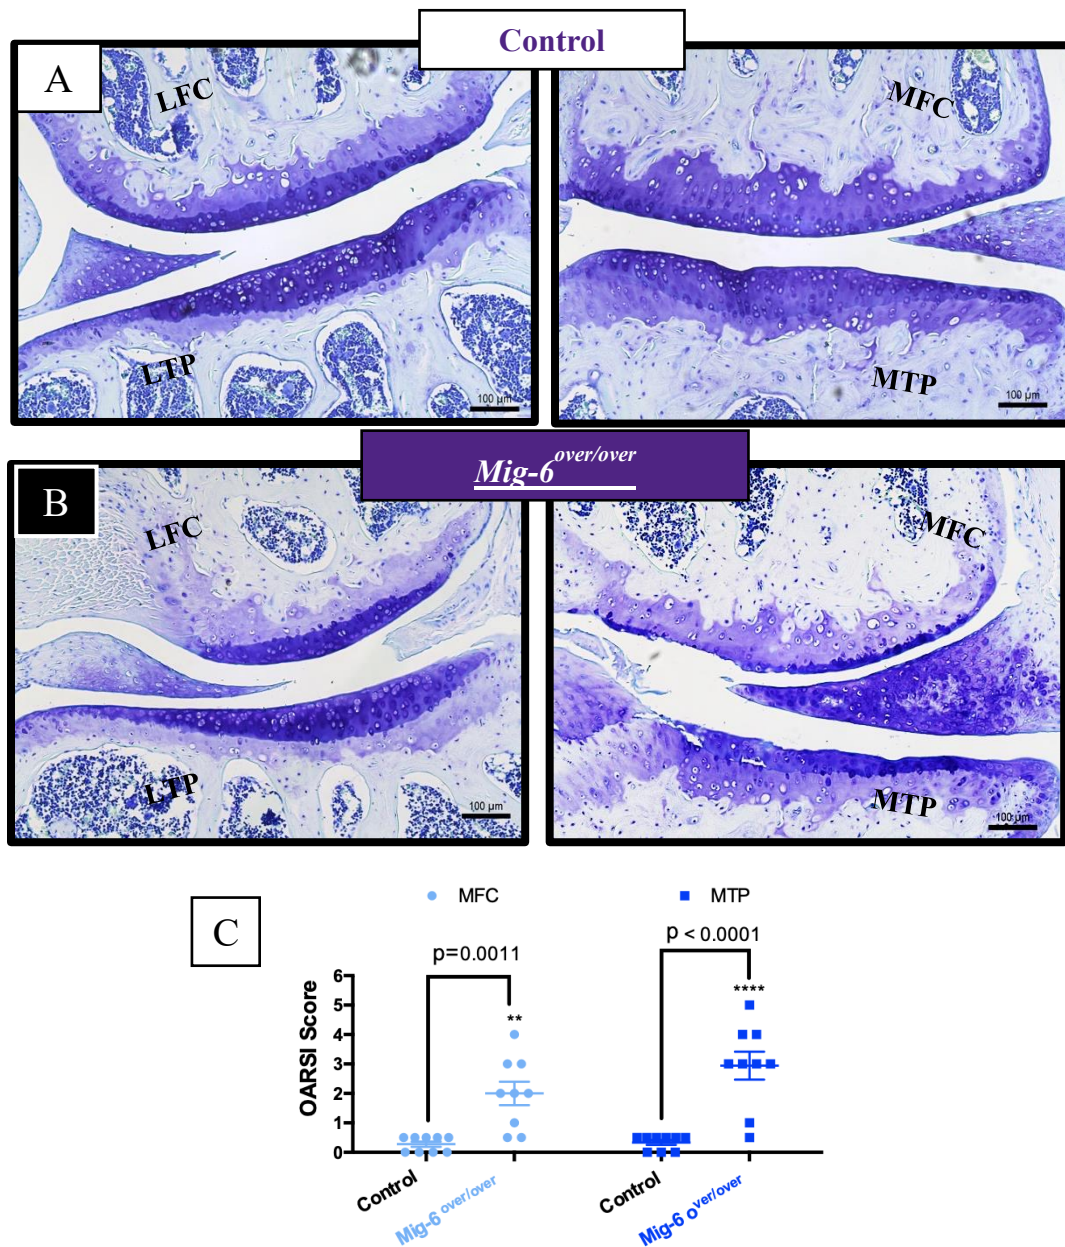

**Figure 5) 12 months old *Mig-6<sup>over/over</sup>* male mice develop OA-like cartilage degeneration.** Representative images of Toluidine Blue stained sections of knee joints from 12-month male control (A) and male *Mig-6* over (B) mice were evaluated for cartilage damage following OARSI histopathological scale on the two quadrants of the knee: MFC = medial femoral condyle, MTP = medial tibial plateau. OARSI based cartilage degeneration scores are significantly higher in the MFC and MTP of *Mig-6* overexpressing mice, corresponding to the increased damage observed histologically (C). Data analyzed by two-way ANOVA with Bonferroni's multiple comparisons



test. Individual data points presented with mean  $\pm$  SEM. All scale bars = 100  $\mu$ m. N = 9 mice/group.

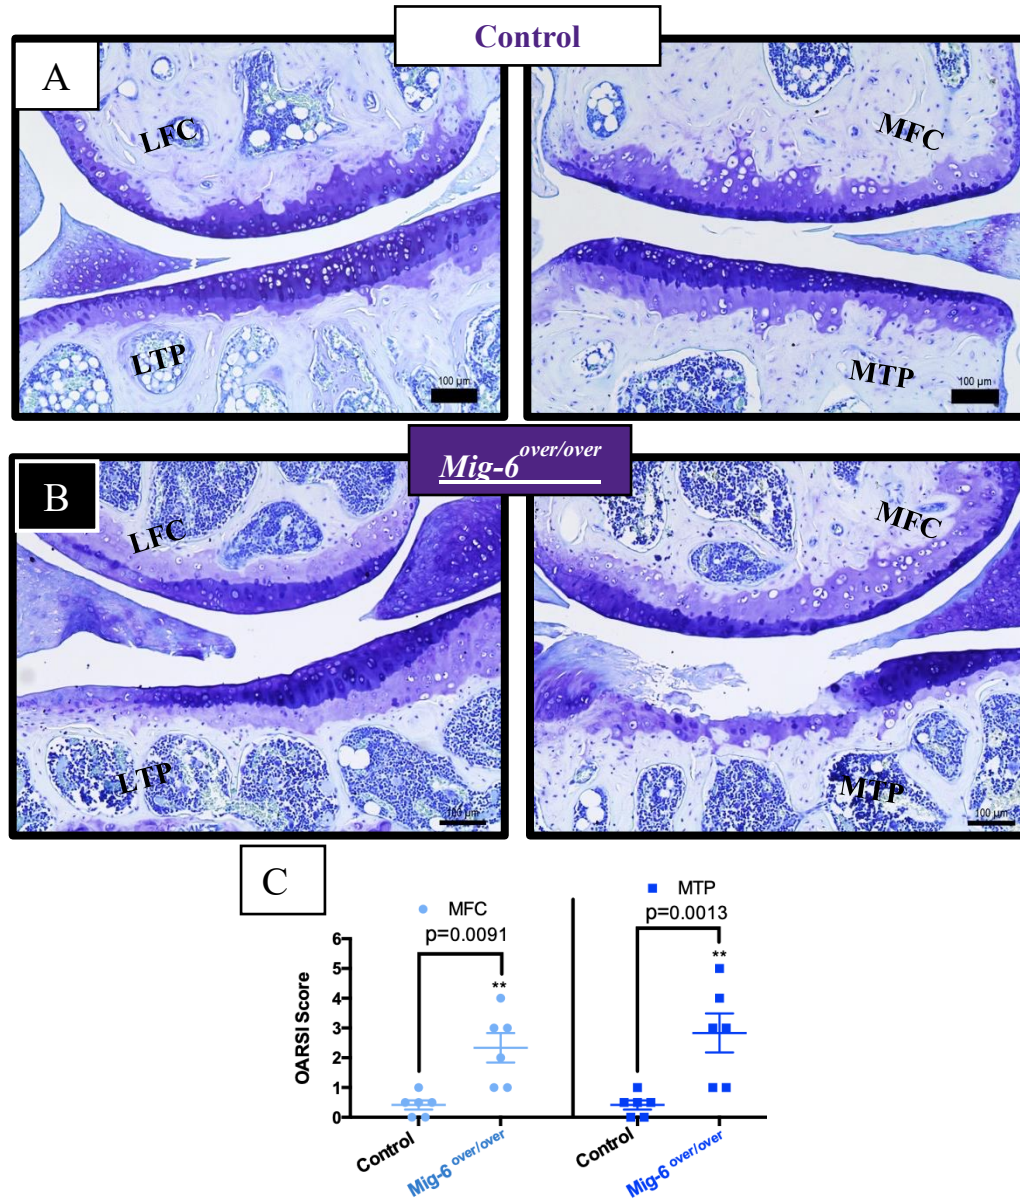

**Figure 6) 18 months old *Mig-6*<sup>over/over</sup> mice leads to advanced OA-like cartilage.** Representative images of Toluidine Blue stained sections of knee joints from 18-month male control (A) and male *Mig-6* over (B) mice were evaluated for cartilage damage following OARSI histopathological scale on the two quadrants of the knee: MFC = medial femoral condyle, MTP = medial tibial plateau. OARSI based cartilage degeneration scores are higher both in the MFC and MTP of *Mig-6* overexpressing mice, corresponding to the increased damage observed histologically. (C) Data analyzed by two-way ANOVA with Bonferroni's multiple comparisons test. Individual data points presented with mean  $\pm$  SEM. All scale bars = 100  $\mu$ m. N = 6 mice/group.

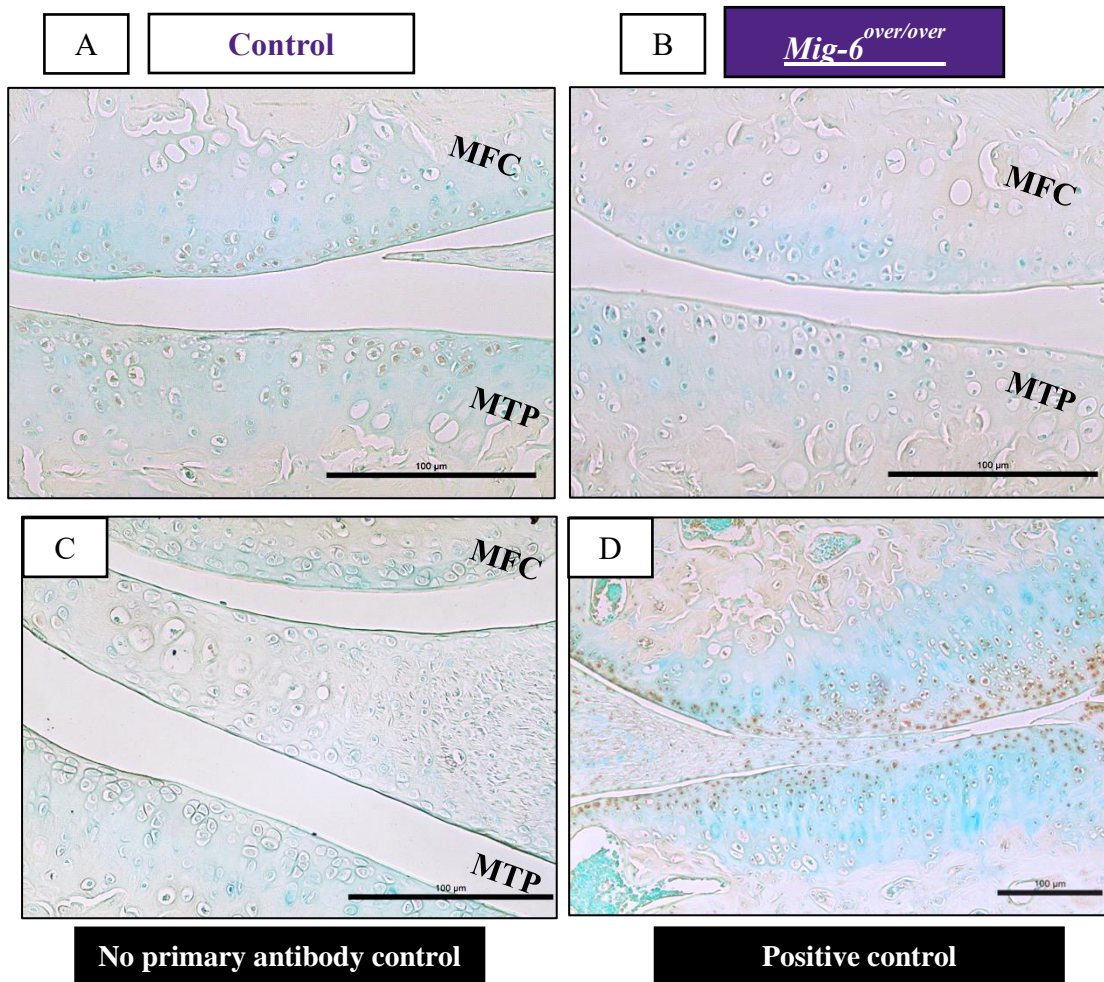

**Figure 7) Phospho-EGFR staining is decreased in the articular cartilage of cartilage specific *Mig-6* overexpressing mice at 11 weeks of age.** Immunostaining of phosphorylated epidermal growth factor receptor (pEGFR; Tyr-1173) in the knee joints of 11 week old *Mig-6*<sup>over/over</sup>*Col2a1-Cre*<sup>+/-</sup> (**B**) is decreased in response to increased *Mig-6* levels. Frontal sections of mice articular cartilage, as negative control, exhibited no staining (**C**). Also, cartilage-specific deletion of *Mig-6*, serving as positive control (**D**). N=5 mice/genotyping. MFC = medial femoral condyle and MTP = medial tibial plateau. Scale bar = 100μm.



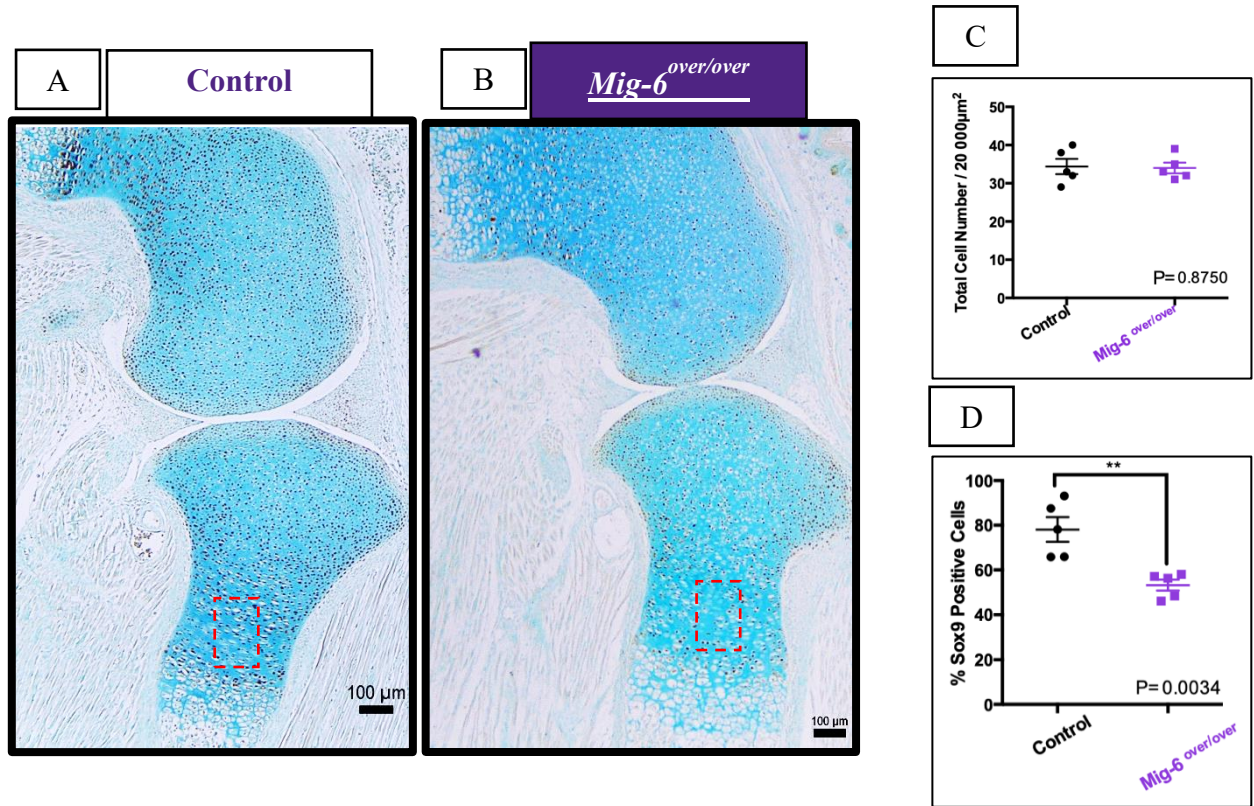

**Figure 8) SOX9 immunostaining shows a decrease in *Mig-6* overexpressors mice at postnatal day 0 (p0).** Ratio between the total cell number from control and *Mig-6* over (B). Ratio between the percentage of Sox9 positive cells from control and *Mig-6* over at p0 mice (C). Data analyzed by two tailed student t-tests from 5 mice per group. Individual data points presented with mean ± SEM (P<0.05). Scale bar = 100μm.

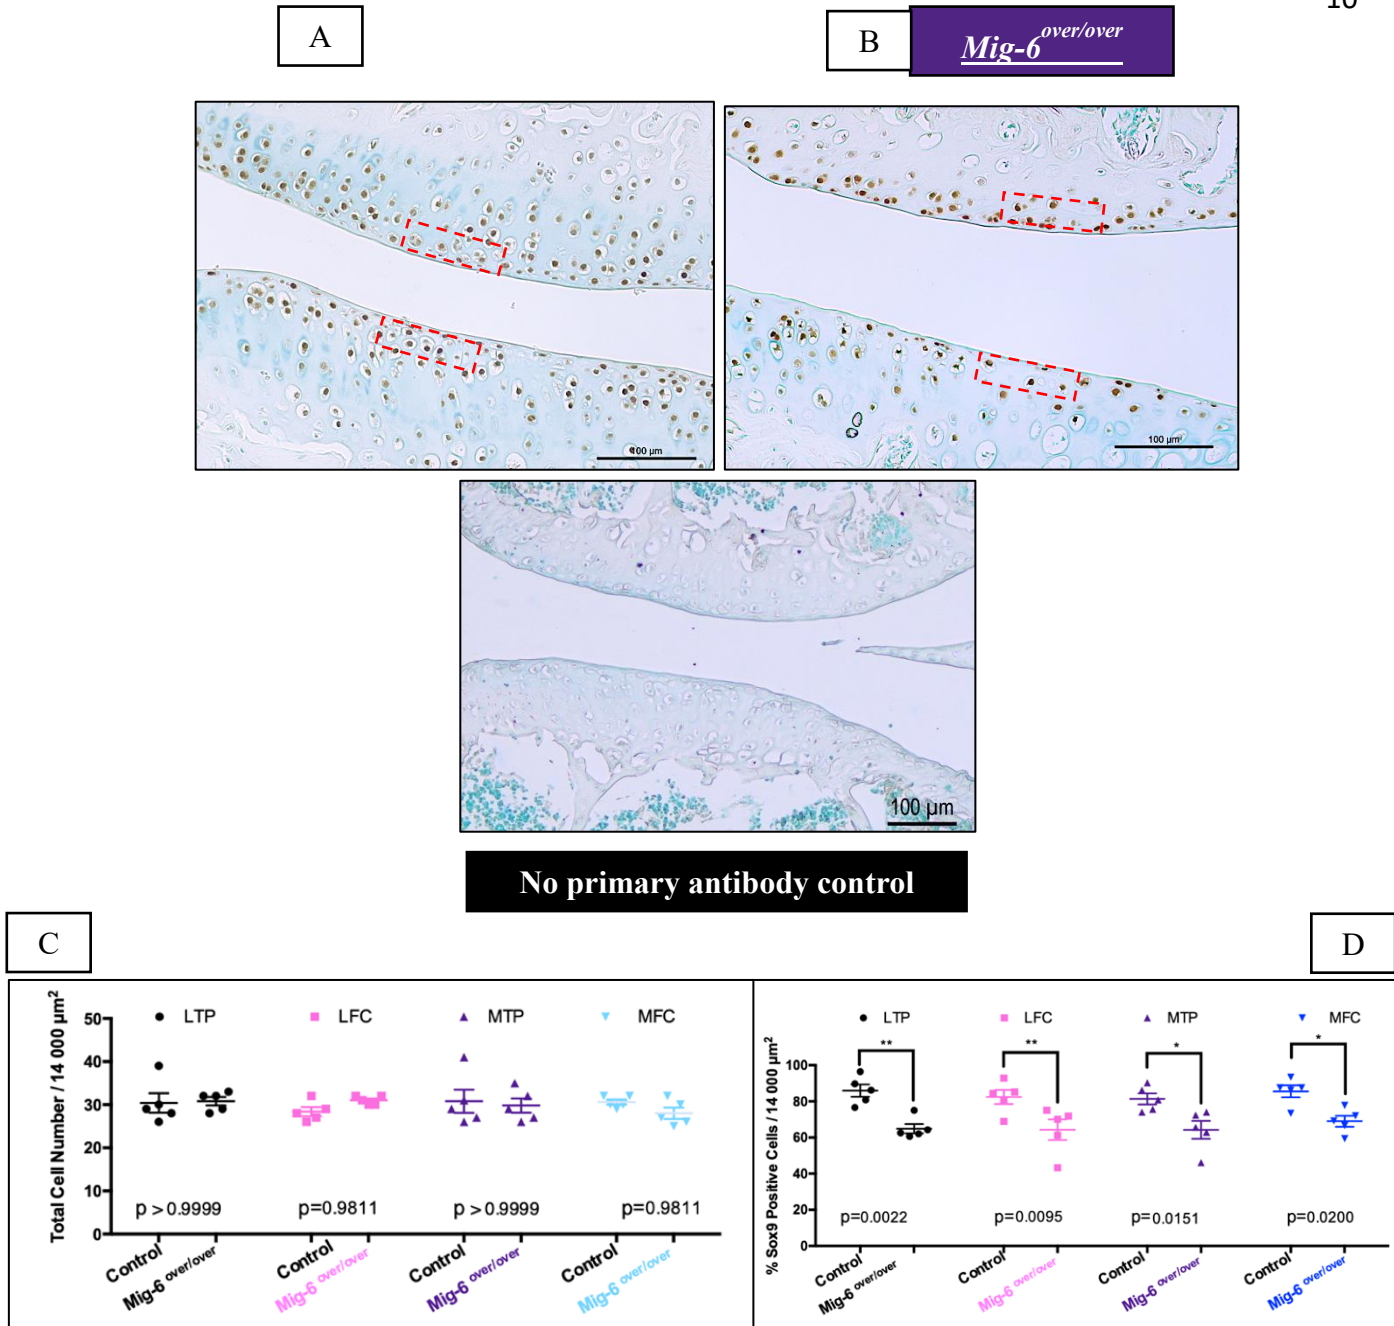

**Figure 9 ) SOX9 immunostaining shows a decrease in Mig-6 overexpressors mice at 6 weeks-old male mice control and Mig-6over . No primary antibody for SOX9 display no staining with methyl green countersain in mice.** Ratio between the total cell number from control and Mig-6over at 6 weeks-old male mice (C). Ratio between the percentage of Sox9 positive cells from control and Mig-6over at 6 weeks-old male mice (D). Data analyzed by two-way ANOVA (95% CI) with Bonferroni post-hoc test. Individual data points presented with mean  $\pm$  SEM; N= 5 mice/genotyping. LFC = lateral femoral condyle, LTP = lateral tibial plateau, MFC = medial femoral condyle and MTP = medial tibial plateau. Scale bar = 100 $\mu$ m.



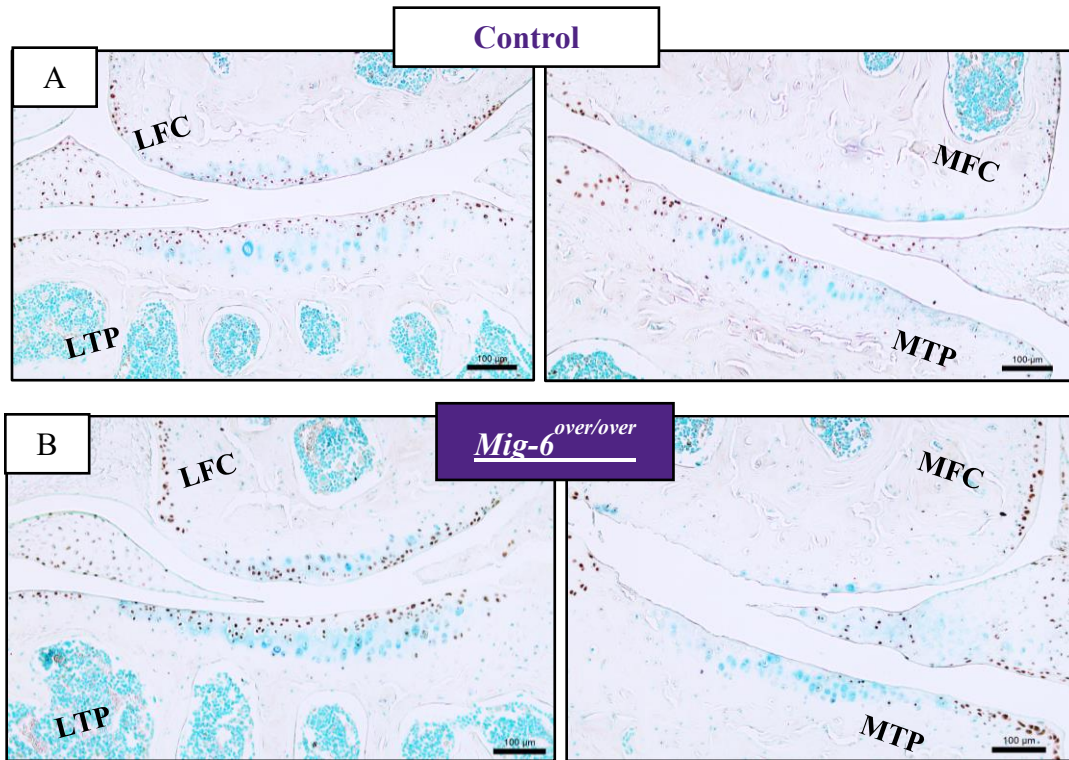

**Figure 10) 12-month-old cartilage specific Mig-6 overexpressing mice show decreased SOX9 immunostaining.** Representative SOX9 immunostained in male mice (n=5) in MFC and MTP show decreased staining intensity in Mig-6 over mice (B) when compared to control (A). No primary control for articular cartilage (C). LFC = lateral femoral condyle, LTP = lateral tibial plateau, MFC = medial femoral condyle and MTP = medial tibial plateau. Scale bar = 100μm.

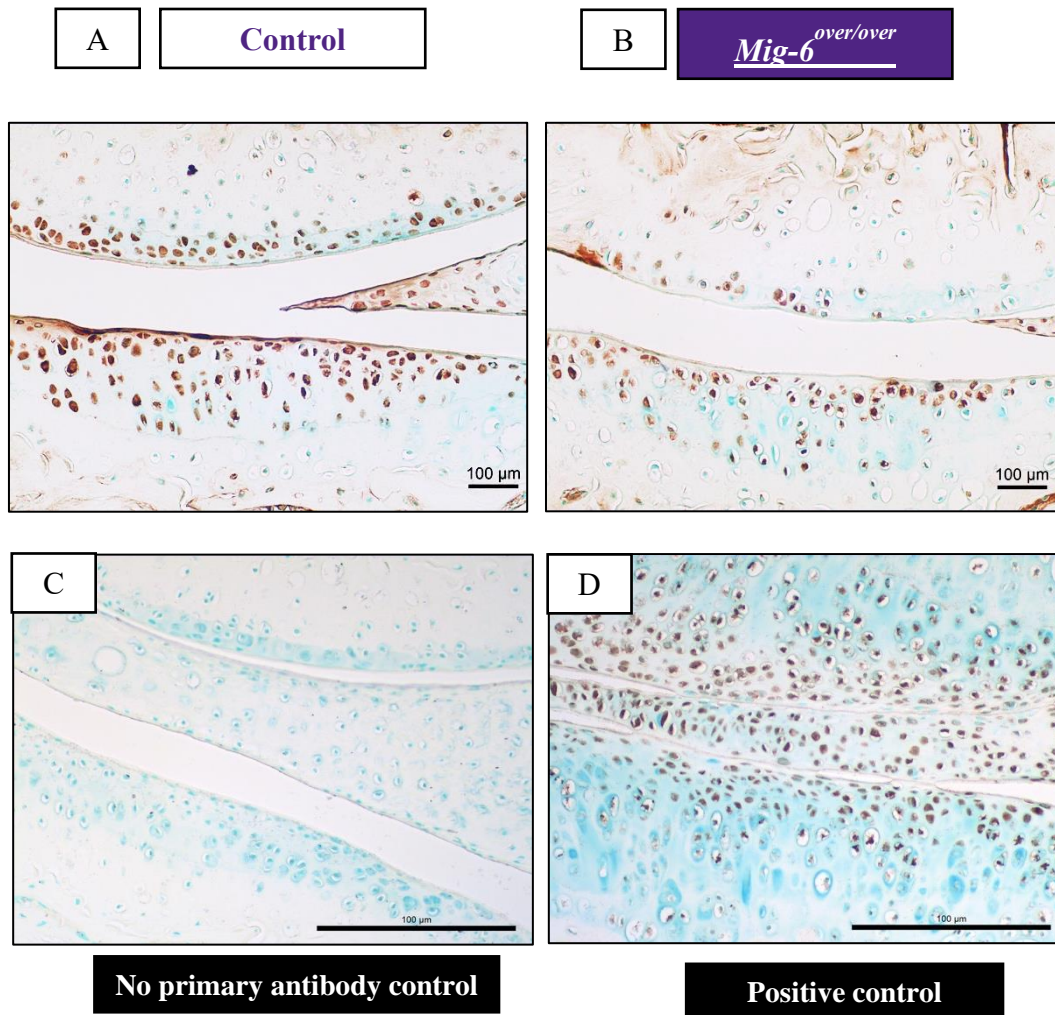

**Figure 11) Lubricin immunostaining is slightly decreased in the articular cartilage of cartilage specific *Mig-6* overexpressing mice at 11 weeks of age.** Immunostaining of sections of the knee joint indicate the presence of Lubricin (*PRG4*) in the superficial zone chondrocytes. IHC reveals no staining for the negative control (C) and *Mig-6* KO, serving as positive control (D). N=4-5 mice/genotyping. MFC = medial femoral condyle and MTP = medial tibial plateau. Scale bar = 100μm.

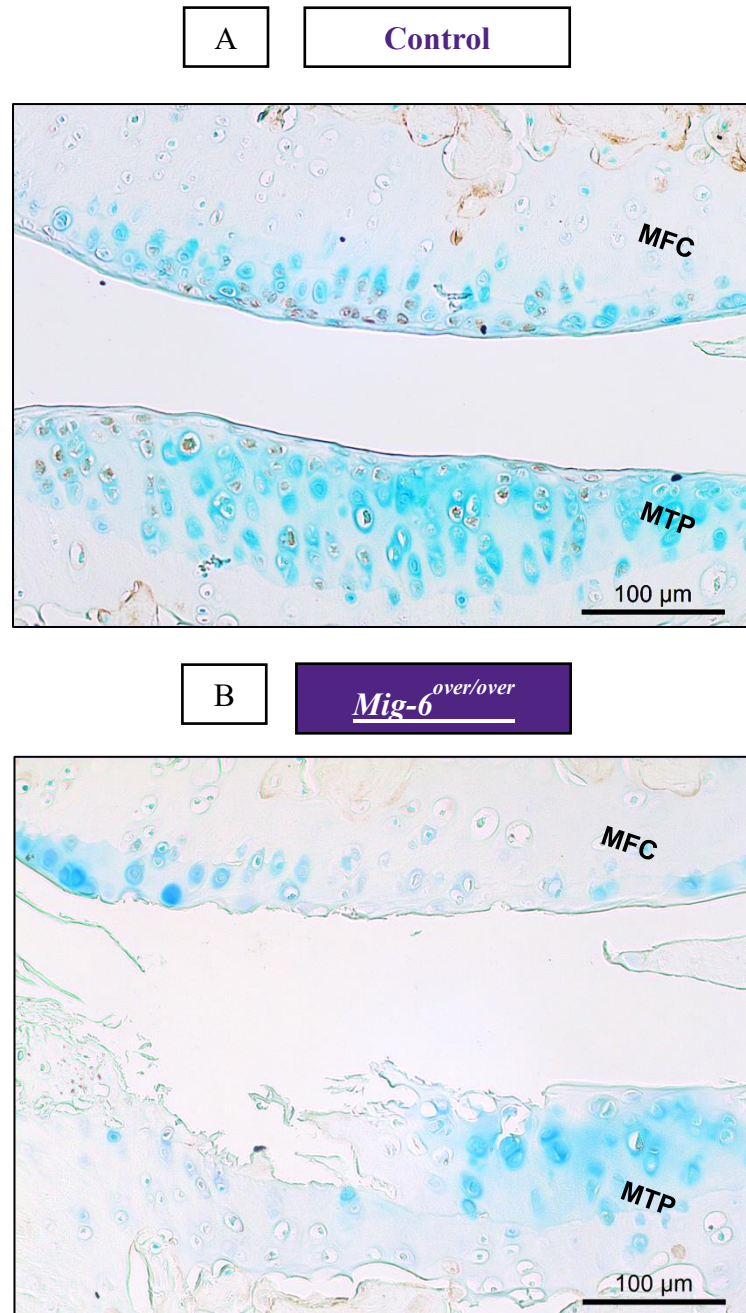

**Figure 12) Lubricin immunostaining is decreased in the articular cartilage of cartilage specific Mig-6 overexpressing mice at 12 months of age.** Immunostaining of sections of the knee joint indicate the presence of Lubricin (*PRG4*) in the superficial zone chondrocytes. N=4-5 mice/genotyping. MFC = medial femoral condyle and MTP = medial tibial plateau. Scale bar = 100μm.



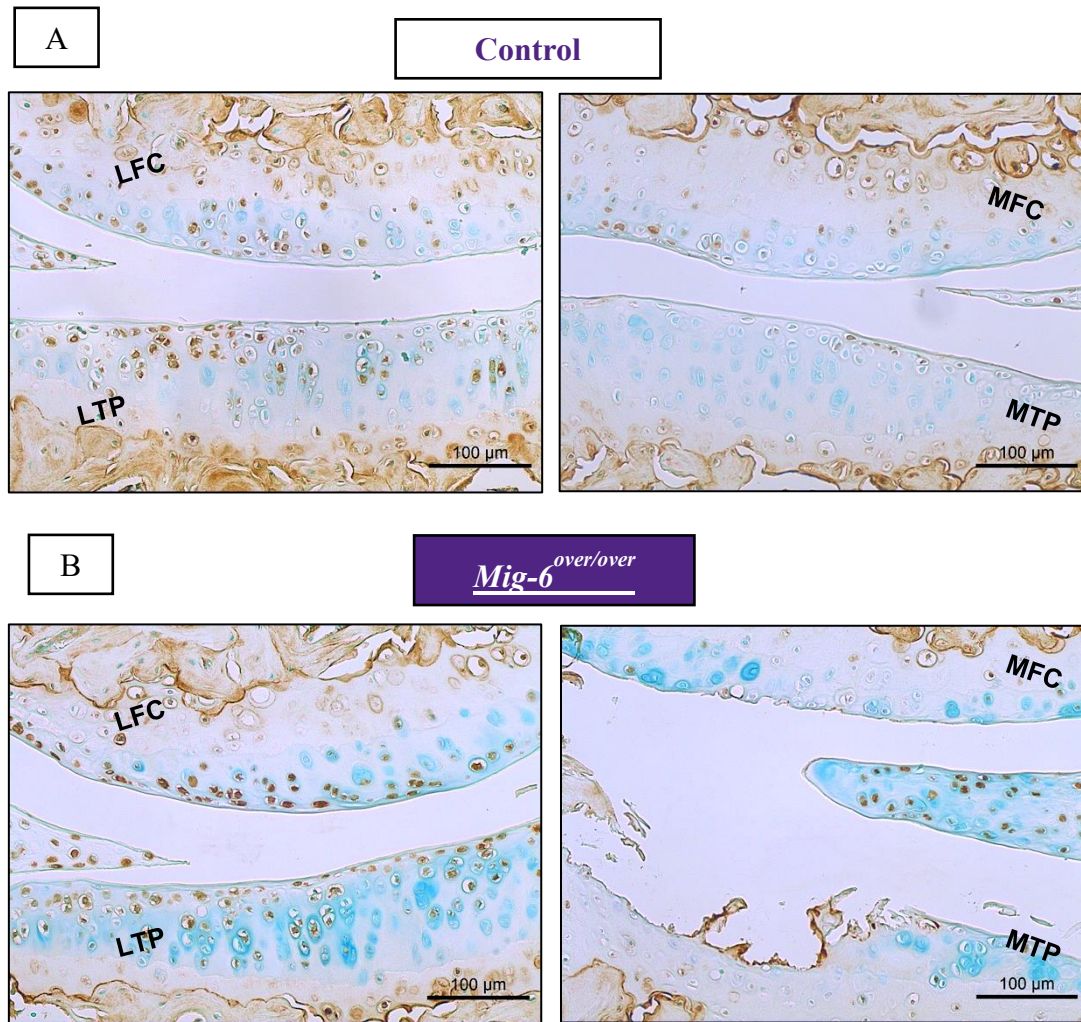

**Figure 13) 12 month-old cartilage specific Mig-6 overexpressing mice show similar pattern of MMP13 as the control mice.** Representative immunohistochemistry of matrix metalloproteinase 13 (MMP13) for Mig-6 overexpression mice at 12 months control (A) and cartilage specific Mig-6 overexpression (B). No primary control for articular cartilage (C). N=5 mice/genotyping. LFC = lateral femoral condyle, LTP = lateral tibial plateau, MFC = medial femoral condyle and MTP = medial tibial plateau. Scale bar = 100μm.
